# Supplementary material for: Automated electrosynthesis reaction mining with multimodal large language models (MLLMs)
Source: Royal Society of Chemistry journal article supplement (doi:10.1039/d4sc04630g), 2024-01-01
Supplement: d4sc04630g1.pdf [file d4sc04630g1.pdf]

## **Supplementary Information: Automated electrosynthesis reaction mining with multimodal large language models (MLLMs)**

Shi Xuan Leong,<sup>1,2</sup> Sergio Pablo-García,<sup>1,3,4</sup> Zijian Zhang,<sup>3,4</sup> Alán Aspuru-Guzik<sup>1,3,4,5,6,7,8\*</sup>

<sup>1</sup>Department of Chemistry, University of Toronto, Lash Miller Chemical Laboratories, 80 St. George Street, ON M5S 3H6, Toronto, Canada

<sup>2</sup>Division of Chemistry and Biological Chemistry, School of Chemistry, Chemical Engineering and Biotechnology, Nanyang Technological University, 21 Nanyang Link, Singapore 637371

<sup>3</sup>Department of Computer Science, University of Toronto, Sandford Fleming Building, 10 King's College Road, ON M5S 3G4, Toronto, Canada

<sup>4</sup>Vector Institute for Artificial Intelligence, 661 University Ave. Suite 710, ON M5G 1M1, Toronto, Canada

<sup>5</sup>Acceleration Consortium, 80 St George St, M5S 3H6, Toronto, Canada

<sup>6</sup>Department of Materials Science & Engineering, University of Toronto, 184 College St., M5S 3E4, Toronto, Canada

<sup>7</sup>Department of Chemical Engineering & Applied Chemistry, University of Toronto, 200 College St. ON M5S 3E5, Toronto, Canada

<sup>8</sup>Lebovic Fellow, Canadian Institute for Advanced Research (CIFAR), 661 University Ave., M5G 1M1, Toronto, Canada

\*Corresponding author email: alan@aspuru.com

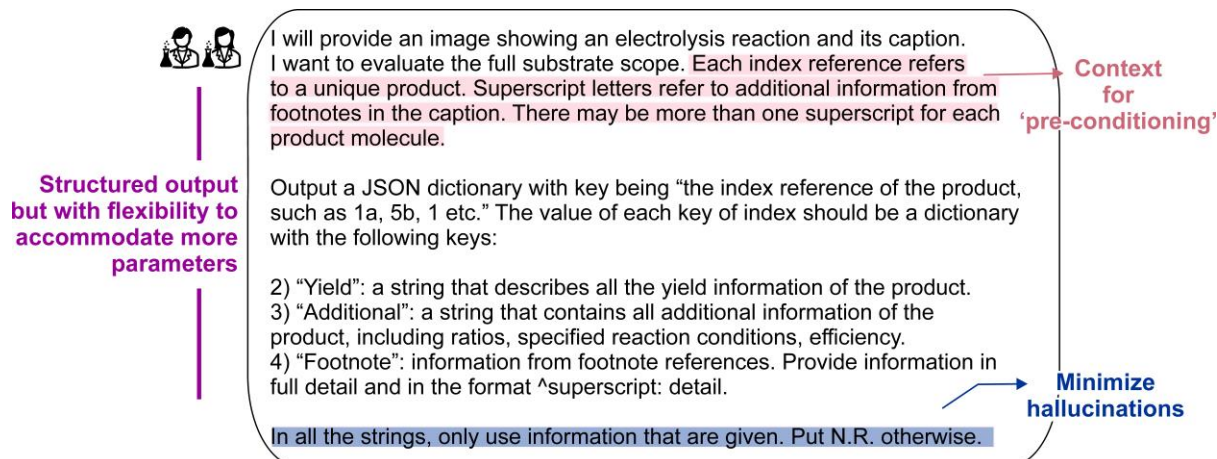

**Figure S1.** Full formal prompt to extract footnote cross-references description and substrate-specific information including index identifier, yield information, and any additional information related to the investigated reaction for each synthesized product.

## Supplementary Note 1.

### (A) Error type 1: Misclassification

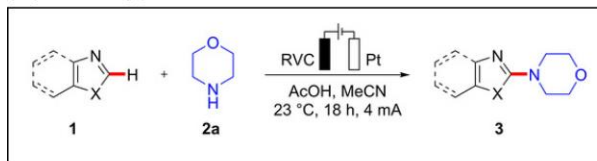

```

1  {}
2  {
3  "anode material": "Pt",
4  "cathode material": "RVC",
5  "electrolytes": "AcOH, MeCN",
6  "solvents": "N.R.",
7  "current": "4 mA",
8  "duration": "18 h",
9  "air/inert": "N.R.",
10 "temperature": "23 °C",
11 "others": "N.R."
12 }
13 ...

```

→ anode and cathode materials are swapped  
 → solvent misclassified as electrolyte

### (B) Error type 2: Failure to identify

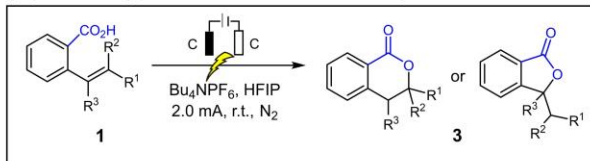

```

1  {}
2  {
3  "anode material": "carbon",
4  "cathode material": "N.R.",
5  "electrolytes": "Bu4NPF6 (2.0 mM) in HFIP",
6  "solvents": "N.R.",
7  "current": "2.0 mA",
8  "duration": "N.R.",
9  "air/inert": "N2",
10 "temperature": "room temperature",
11 "others": "N.R."
12 }
13 ...

```

→ Failure to identify cathode  
 → Error type 1 (solvent misclassified as electrolyte)

### (C) Error type 3: Cannot recognize contextual abbreviations

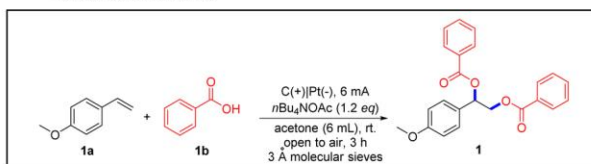

```

1  {}
2  {
3  "anode material": "Pt",
4  "cathode material": "C(+)Pt",
5  "electrolytes": "nBu4NOAc(1.2 eq.)",
6  "solvents": "acetone (6 mL, open to air)",
7  "current": "N.R.",
8  "duration": "3 h",
9  "air/inert": "open to air",
10 "temperature": "N.R.",
11 "others": "N.R."
12 }
13 ...

```

→ Error type 2 (cannot identify)

**Figure S2.** Example of common errors observed in unsuccessful (incorrect) responses outputs for Task 1, namely a) misclassification of identified reaction conditions, as well as failure to identify b) reaction conditions and c) contextual abbreviations. The first two response outputs are from Gemini and the third response output is from LLaVA. The diagrams depicted are adapted with permission from ref. 1 © 2018 Wiley-VCH Verlag GmbH & Co. KGaA, Weinheim; ref. 2 © 2022 Wiley-VCH GmbH; and ref 3. with permission from Royal Society of Chemistry.

In terms of reaction diagram parsing, GPT-4V,<sup>4</sup> Gemini<sup>5</sup> and Claude 3<sup>6</sup> demonstrate comparable accuracies at identifying and classifying the standard reaction parameters including current, duration, air/inert atmosphere, and temperature, with  $\geq 96\%$  accuracy using both hard and soft match evaluation. For domain-specific parameters whose exact roles demand domain

knowledge, the models perform reasonably well but exhibit lower accuracies for solvents and electrode materials, with GPT-4V outperforming the other MLLMs. Gemini and Claude 3 have a higher tendency to misclassify solvents as electrolytes/additives (Figure S2-A), as reflected from their lower hard match accuracy of 59% and 68%, respectively, compared to 83% for GPT-4V. For electrode materials, Gemini and Claude 3 often fail to identify the electrode materials and would return incorrect “Not reported (N.R.)” responses or provide a random material (Figure S2-B), thus resulting in lower soft match anode (cathode) identification accuracies of 66(66) % and 72(69) % for the two models, respectively, compared to 93(93) % using the GPT-4V model.

As for InternVL<sup>7</sup> and LLaVA,<sup>8,9</sup> they both exhibit poor contextual awareness of abbreviations that are commonly found in scientific publications, resulting in poor identification accuracies across all categories. For instance, they often fail to recognize ““N<sub>2</sub>” and “Ar” as descriptors of an inert atmosphere, as well as “RT” or “r.t.” as abbreviations for room temperature, resulting in the generation of inaccurate ‘Not reported (N.R.)’ responses (Figure S2-C). In addition, they frequently fail to identify the electrode materials and/or fully identify mixed solvents and/or electrolyte systems.

## Supplementary Note 2.

### (A) ReactionDataExtractor2.0

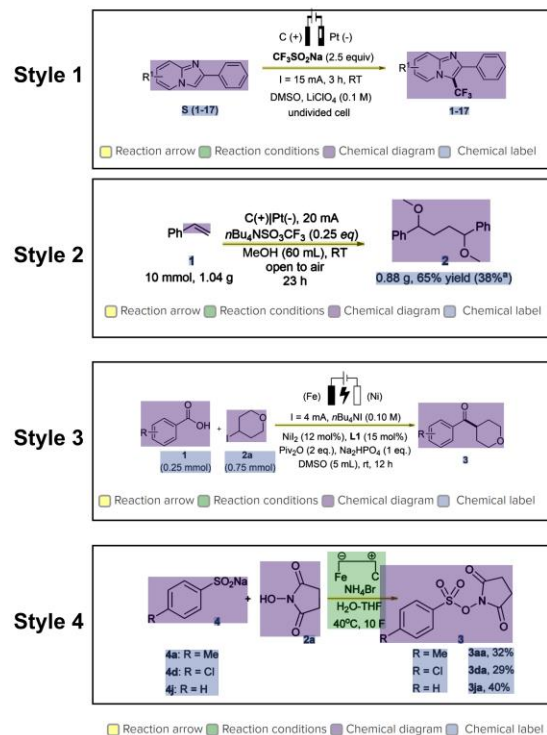

### (B) RxnScribe

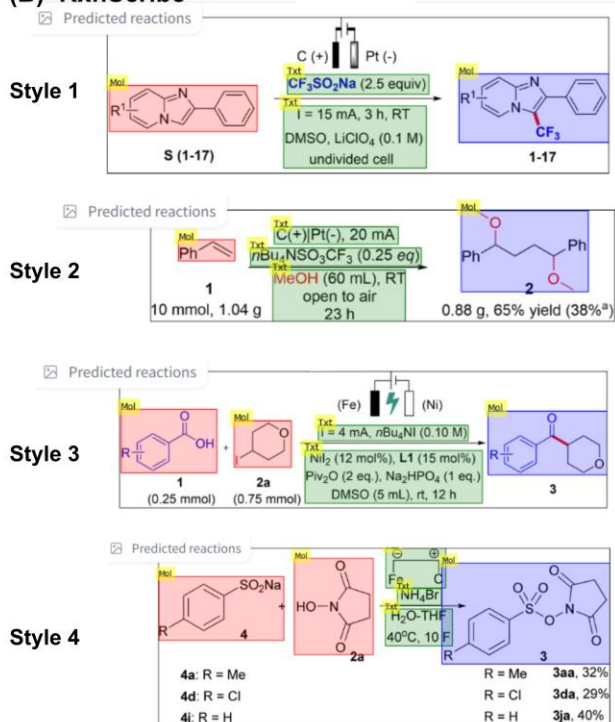

**Figure S3.** (A) Example visualizations of (A) ReactionDataExtractor2.0 and (B) RxnScribe predictions using the web-based interfaces *via* <https://www.reactiondataextractor.org/demo> and <https://huggingface.co/spaces/yujieq/RxnScribe>, respectively. The diagrams depicted were adapted with permission from ref. 10 (Style 1) © 2023 Wiley-VCH GmbH, ref. 11 (Style 2) with permission from the Royal Society of Chemistry, ref. 12 (Style 3) © 2022 Wiley-VCH GmbH, and ref. 13 with permission from the Royal Society of Chemistry.

We compare the MLLM-based reaction diagram parsing with two reaction diagram parsing software – ReactionDataExtractor2.0<sup>14</sup> and RxnScribe<sup>15</sup>. The former is a rule-based pipeline while the latter is a sequence generation model. Considering that these toolkits are trained on chemical reaction schemes and not specifically tailored for electrochemistry reaction diagrams, we performed the equivalent of a soft match evaluation, whereby the identified parameter is assigned as a correct prediction if it is included under “Reaction conditions” for both ReactionDataExtractor2.0 and RxnScribe. The poor performance of ReactionDataExtractor2.0 with < 40% accuracy across all categories is due to its failure at identifying the regions with

reaction conditions for most of the reaction diagrams, despite accurately identifying the location and direction of the reaction arrows (**Figure S2A**). On the other hand, RxnScribe achieves > 90% accuracy for 5 out of 10 categories, comparable to that of MLLM-based reaction diagram parsing (**Figure 3A** in main text). We observe that the high accuracies are for more standard reaction conditions such as duration and atmospheric conditions, and for quantitative categories such as solvent and electrolyte amounts. In comparison, domain-specific information such as the electrode materials and the electrolytes are poorly identified, whereby RxnScribe makes mistakes such as missing one or both electrode materials. We also note that the software is prone to misspelling such as “H<sub>2</sub>O” instead of “H<sub>2</sub>O”, and “<sup>n</sup>BuANBF<sub>4</sub>” instead of “<sup>n</sup>Bu<sub>4</sub>NBF<sub>4</sub>”, likely due to model artefacts. These misspellings were disregarded for the purpose of comparison in this study.

### Supplementary Note 3.

A sample response output for Task 2 – resolving cross-modality interdependencies, generated using GPT-4V as the MLLM is presented below. Yield and any additional information of each substrate (indicated by its unique index label), are extracted from the figure and captions and organized into a structured dictionary. Notably, full footnote references are accurately identified, e.g. for substrates 3ad, 3ag, 3ba etc.

```
{
  "3aa": {
    "yield": "81%",
    "additional": "N.R.",
    "footnote": "N.R."
  },
  "3ab": {
    "yield": "80%",
    "additional": "N.R.",
    "footnote": "N.R."
  },
  "3ac": {
    "yield": "81%",
    "additional": "N.R.",
    "footnote": "N.R."
  },
  "3ad": {
    "yield": "75%",
    "additional": "N.R.",
    "footnote": "^a: 6 h."
  },
  "3ae": {
    "yield": "84%",
    "additional": "N.R.",
    "footnote": "N.R."
  },
  "3af": {
    "yield": "43%",
    "additional": "N.R.",
    "footnote": "N.R."
  },
  "3ag": {
    "yield": "87%",
    "additional": "N.R.",
    "footnote": "^b: 7 h."
  },
}
```

```

"3ah": {
  "yield": "trace",
  "additional": "N.R.",
  "footnote": "N.R."
},
"3ai": {
  "yield": "95%",
  "additional": "N.R.",
  "footnote": "^c: 8 h."
},
"3aj": {
  "yield": "88%",
  "additional": "N.R.",
  "footnote": "^c: 8 h."
},
"3ak": {
  "yield": "81%",
  "additional": "N.R.",
  "footnote": "N.R."
},
"3ba": {
  "yield": "91%",
  "additional": "N.R.",
  "footnote": "^d: 3aa as a by-product was isolated in 40% yield."
},
"3ca": {
  "yield": "72%",
  "additional": "N.R.",
  "footnote": "^c: 8 h."
},
"3da": {
  "yield": "85%",
  "additional": "N.R.",
  "footnote": "^a: 6 h."
},
"3ea": {
  "yield": "66%",
  "additional": "N.R.",
  "footnote": "^b: 7 h."
},
"3fa": {
  "yield": "44%",
  "additional": "3aa as a by-product was isolated in 40% yield.",
  "footnote": "N.R."
},
"3ga": {
  "yield": "42%",
  "additional": "N.R.",

```



```

    "footnote": "N.R."
  },
  "3ha": {
    "yield": "92%",
    "additional": "N.R.",
    "footnote": "^a: 6 h."
  },
  "3ia": {
    "yield": "88%",
    "additional": "N.R.",
    "footnote": ^b: 7 h."
  },
  "3ja": {
    "yield": "42%",
    "additional": "N.R.",
    "footnote": "N.R."
  },
  "3ka": {
    "yield": "90%",
    "additional": "N.R.",
    "footnote": {}
  },
  "3la": {
    "yield": "87%",
    "additional": "N.R.",
    "footnote": {}
  },
  "3ma": {
    "yield": "53%",
    "additional": "3aa as a by-product was isolated in 40% yield.",
    "footnote": {
      ^d: "3aa as a by-product was isolated in 40% yield."
    }
  },
  "3na": {
    "yield": "92%",
    "additional": "N.R.",
    "footnote": {}
  },
  "3oa": {
    "yield": "90%",
    "additional": "N.R.",
    "footnote": {}
  },
  "3pa": {
    "yield": "91%",
    "additional": "N.R.",
    "footnote": {}
  }

```

```
},  
"3qa": {  
  "yield": "83%",  
  "additional": "N.R.",  
  "footnote": {}  
},  
"3ra": {  
  "yield": "18%",  
  "additional": "N.R.",  
  "footnote": {}  
}  
}
```

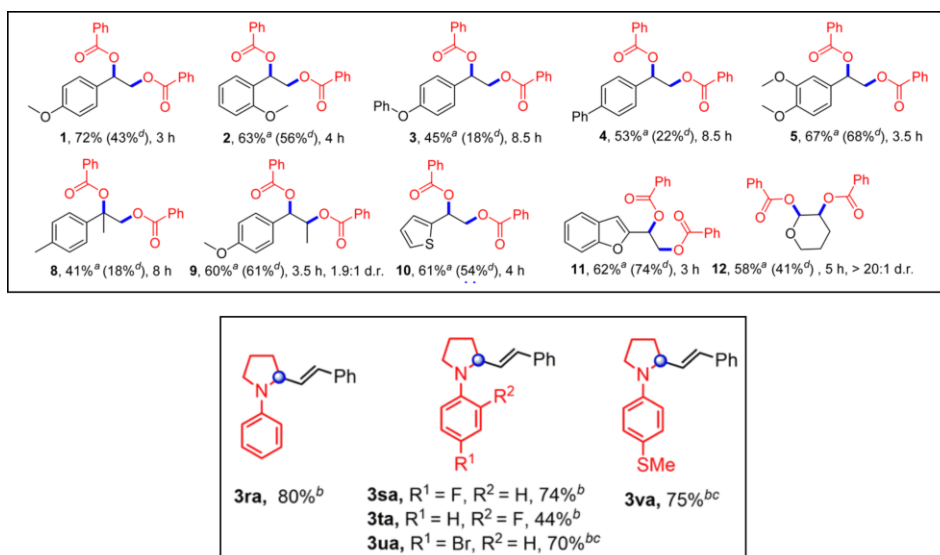

**Figure S4.** Example images with false negative assignments (i.e., mis-assignment or overlooking of footnote references). Adopted with permission from ref. 3 (top) and ref. 16 (bottom), with permission from the Royal Society of Chemistry.

**Table S1.** List of DOI identifiers

| #  | DOI identifier         | #  | DOI identifier         | #  | DOI identifier         |
|----|------------------------|----|------------------------|----|------------------------|
| 1  | 10.1039/d1ob00079a     | 23 | 10.1002/adsc.202301071 | 45 | 10.1002/anie.201909951 |
| 2  | 10.1039/d1qo00038a     | 24 | 10.1002/adsc.202300118 | 46 | 10.1002/anie.202201595 |
| 3  | 10.1039/D3GC02701E     | 25 | 10.1002/adsc.202300730 | 47 | 10.1002/adsc.202200003 |
| 4  | 10.1039/C80B03162B     | 26 | 10.1002/adsc.202301343 | 48 | 10.1002/ejoc.202000311 |
| 5  | 10.1039/C9GC01474H     | 27 | 10.1002/adsc.202000997 | 49 | 10.1002/ejoc.202300927 |
| 6  | 10.1039/D1GC00661D     | 28 | 10.1002/anie.201910077 | 50 | 10.1002/anie.202212131 |
| 7  | 10.1039/D2GC04399H     | 29 | 10.1002/anie.202207660 | 51 | 10.1002/ajoc.202100620 |
| 8  | 10.1039/D3GC02345A     | 30 | 10.1002/ajoc.202200719 | 52 | 10.1002/cssc.201900378 |
| 9  | 10.1039/D20B01402E     | 31 | 10.1002/ajoc.202200425 | 53 | 10.1039/d3ob00671a     |
| 10 | 10.1039/D3NJ05205B     | 32 | 10.1002/ajoc.202300294 | 54 | 10.1039/D2GC02086F     |
| 11 | 10.1039/D3GC03389A     | 33 | 10.1002/chem.201802832 | 55 | 10.1039/D1GC01069G     |
| 12 | 10.1039/D0GC00771D     | 34 | 10.1002/chem.202201654 | 56 | 10.1039/D30B00831B     |
| 13 | 10.1039/D3SC00527E     | 35 | 10.1002/celc.202200989 | 57 | 10.1039/C8CC09899A     |
| 14 | 10.1039/C8GC01411F     | 36 | 10.1002/celc.201800422 | 58 | 10.1039/C9CC00975B     |
| 15 | 10.1039/C7GC00468K     | 37 | 10.1002/ejoc.201901928 | 59 | 10.1039/C8CC06451B     |
| 16 | 10.1039/D3Q000204G     | 38 | 10.1002/ejoc.202300553 | 60 | 10.1002/anie.201808555 |
| 17 | 10.1039/D2CC03883H     | 39 | 10.1002/chem.202100960 | 61 | 10.1002/asia.202200780 |
| 18 | 10.1039/D2SC05507D     | 40 | 10.1002/celc.202101155 | 62 | 10.1002/cctc.202300258 |
| 19 | 10.1039/C9CC03789F     | 41 | 10.1002/anie.201610715 | 63 | 10.1002/celc.201900138 |
| 20 | 10.1039/C80B00500A     | 42 | 10.1039/C9CC03789F     | 64 | 10.1002/adsc.202200932 |
| 21 | 10.1002/ejoc.202300063 | 43 | 10.1002/anie.202013478 | 65 | 10.1039/D2GC00457G     |
| 22 | 10.1002/adsc.202200847 | 44 | 10.1002/celc.201900080 |    |                        |

- 1 **Table S2.** Hard and soft match % precision of electrosynthesis reaction diagram parsing across different MLLMs without any visual prompting.
- 2 Each model prediction was assigned as follows: true positive for correct identification of reaction parameter; false positive for incorrect assignment
- 3 or redundant information; true negative for correct identification of unspecified reaction parameters; and false negative for missing information.

|                                   | <b>Precision</b> |                    |                              |                                        |                 |                       |                |                 |                   |                    |
|-----------------------------------|------------------|--------------------|------------------------------|----------------------------------------|-----------------|-----------------------|----------------|-----------------|-------------------|--------------------|
|                                   | <b>Anode (+)</b> | <b>Cathode (-)</b> | <b>Electrolyte/additives</b> | <b>Electrolytes /additives amounts</b> | <b>Solvents</b> | <b>Solvent amount</b> | <b>Current</b> | <b>Duration</b> | <b>Air/ Inert</b> | <b>Temperature</b> |
| <b>GPT-4V</b>                     | 100%<br>(100%)   | 100%<br>(100%)     | 100%<br>(100%)               | 100%<br>(100%)                         | 100%<br>(100%)  | 100%<br>(100%)        | 99%<br>(100%)  | 100%<br>(100%)  | 100%<br>(100%)    | 100%<br>(100%)     |
| <b>Gemini</b>                     | 100%<br>(100%)   | 100%<br>(100%)     | 99%<br>(100%)                | 93%<br>(92%)                           | 100%<br>(100%)  | 93%<br>(85%)          | 100%<br>(100%) | 100%<br>(100%)  | 100%<br>(97%)     | 100%<br>(100%)     |
| <b>Claude 3</b>                   | 100%<br>(100%)   | 100%<br>(100%)     | 99%<br>(99%)                 | 79%<br>(79%)                           | 100%<br>(100%)  | 78%<br>(83%)          | 100%<br>(100%) | 100%<br>(100%)  | 100%<br>(100%)    | 100%<br>(100%)     |
| <b>LLaVA</b>                      | 100%<br>(100%)   | 94%<br>(97%)       | 96%<br>(96%)                 | 60%<br>(62%)                           | 100%<br>(100%)  | 48%<br>(50%)          | 93%<br>(95%)   | 92%<br>(92%)    | 70%<br>(72%)      | 97%<br>(98%)       |
| <b>InternVL</b>                   | 100%<br>(100%)   | 97%<br>(98%)       | 100%<br>(100%)               | 51%<br>(52%)                           | 100%<br>(100%)  | 39%<br>(39%)          | 91%<br>(92%)   | 78%<br>(78%)    | 64%<br>(64%)      | 95%<br>(95%)       |
| <b>ReactionData Extractor 2.0</b> | -<br>(100%)      | -<br>(100%)        | -<br>(96%)                   | -<br>(40%)                             | -<br>(100%)     | -<br>(20%)            | -<br>(84%)     | -<br>(59%)      | -<br>(27%)        | -<br>(92%)         |
| <b>RxnScribe</b>                  | -<br>(100%)      | -<br>(100%)        | -<br>(100%)                  | -<br>(93%)                             | -<br>(100%)     | -<br>(86%)            | -<br>(100%)    | -<br>(100%)     | -<br>(97%)        | -<br>(99%)         |

5 **Table S3.** Hard and soft match % recall of electrosynthesis reaction diagram parsing across different MLLMs without any visual prompting. Each  
6 model prediction was assigned as follows: true positive for correct identification of reaction parameter; false positive for incorrect assignment or  
7 redundant information; true negative for correct identification of unspecified reaction parameters; and false negative for missing information.

|                                   | <b>Recall</b>    |                    |                              |                                       |                 |                       |                |                 |                  |                    |
|-----------------------------------|------------------|--------------------|------------------------------|---------------------------------------|-----------------|-----------------------|----------------|-----------------|------------------|--------------------|
|                                   | <b>Anode (+)</b> | <b>Cathode (-)</b> | <b>Electrolyte/additives</b> | <b>Electrolytes/additives amounts</b> | <b>Solvents</b> | <b>Solvent amount</b> | <b>Current</b> | <b>Duration</b> | <b>Air/Inert</b> | <b>Temperature</b> |
| <b>GPT-4V</b>                     | 85%<br>(93%)     | 85%<br>(93%)       | 100%<br>(100%)               | 100%<br>(100%)                        | 83%<br>(100%)   | 100%<br>(100%)        | 100%<br>(100%) | 100%<br>(100%)  | 100%<br>(100%)   | 100%<br>(100%)     |
| <b>Gemini</b>                     | 61%<br>(66%)     | 50%<br>(59%)       | 89%<br>(89%)                 | 87%<br>(100%)                         | 59%<br>(89%)    | 88%<br>(88%)          | 97%<br>(92%)   | 95%<br>(90%)    | 97%<br>(97%)     | 100%<br>(96%)      |
| <b>Claude 3</b>                   | 56%<br>(72%)     | 54%<br>(69%)       | 96%<br>(98%)                 | 100%<br>(100%)                        | 68%<br>(92%)    | 94%<br>(94%)          | 99%<br>(99%)   | 95%<br>(95%)    | 100%<br>(100%)   | 99%<br>(99%)       |
| <b>LLaVA</b>                      | 16%<br>(29%)     | 20%<br>(37%)       | 54%<br>(58%)                 | 72%<br>(79%)                          | 30%<br>(46%)    | 75%<br>(81%)          | 17%<br>(26%)   | 73%<br>(78%)    | 60%<br>(66%)     | 39%<br>(52%)       |
| <b>InternVL</b>                   | 46%<br>(60%)     | 43%<br>(58%)       | 50%<br>(51%)                 | 53%<br>(55%)                          | 26%<br>(51%)    | 59%<br>(59%)          | 55%<br>(57%)   | 48%<br>(48%)    | 83%<br>(83%)     | 52%<br>(52%)       |
| <b>ReactionData Extractor 2.0</b> | -<br>(24%)       | -<br>(23%)         | -<br>(32%)                   | -<br>(42%)                            | -<br>(33%)      | -<br>(33%)            | -<br>(30%)     | -<br>(36%)      | -<br>(38%)       | -<br>(31%)         |
| <b>RxnScribe</b>                  | -<br>(49%)       | -<br>(49%)         | -<br>(79%)                   | -<br>(83%)                            | -<br>(83%)      | -<br>(100%)           | -<br>(95%)     | -<br>(97%)      | -<br>(100%)      | -<br>(100%)        |

9 **Table S4.** Hard and soft match % F1 score of electrosynthesis reaction diagram parsing across different MLLMs without any visual prompting.  
 10 Each model prediction was assigned as follows: true positive for correct identification of reaction parameter; false positive for incorrect assignment  
 11 or redundant information; true negative for correct identification of unspecified reaction parameters; and false negative for missing information.

|                                   | F1 score     |              |                       |                                 |               |                |               |                |                |                |
|-----------------------------------|--------------|--------------|-----------------------|---------------------------------|---------------|----------------|---------------|----------------|----------------|----------------|
|                                   | Anode (+)    | Cathode (-)  | Electrolyte/additives | Electrolytes /additives amounts | Solvents      | Solvent amount | Current       | Duration       | Air/ Inert     | Temperature    |
| <b>GPT-4V</b>                     | 92%<br>(96%) | 92%<br>(96%) | 100%<br>(100%)        | 100%<br>(100%)                  | 91%<br>(100%) | 100%<br>(100%) | 99%<br>(100%) | 100%<br>(100%) | 100%<br>(100%) | 100%<br>(100%) |
| <b>Gemini</b>                     | 76%<br>(79%) | 67%<br>(74%) | 94%<br>(94%)          | 90%<br>(96%)                    | 74%<br>(94%)  | 90%<br>(86%)   | 99%<br>(96%)  | 97%<br>(95%)   | 99%<br>(97%)   | 100%<br>(98%)  |
| <b>Claude 3</b>                   | 72%<br>(84%) | 70%<br>(82%) | 98%<br>(98%)          | 88%<br>(88%)                    | 81%<br>(96%)  | 85%<br>(88%)   | 99%<br>(99%)  | 97%<br>(97%)   | 100%<br>(100%) | 99%<br>(99%)   |
| <b>LLaVA</b>                      | 28%<br>(45%) | 33%<br>(54%) | 69%<br>(72%)          | 65%<br>(69%)                    | 46%<br>(63%)  | 59%<br>(62%)   | 29%<br>(41%)  | 81%<br>(85%)   | 65%<br>(69%)   | 56%<br>(68%)   |
| <b>InternVL</b>                   | 63%<br>(75%) | 60%<br>(73%) | 67%<br>(68%)          | 52%<br>(54%)                    | 42%<br>(67%)  | 47%<br>(47%)   | 68%<br>(70%)  | 60%<br>(60%)   | 73%<br>(73%)   | 67%<br>(67%)   |
| <b>ReactionData Extractor 2.0</b> | -<br>(38%)   | -<br>(37%)   | -<br>(48%)            | -<br>(41%)                      | -<br>(49%)    | -<br>(25%)     | -<br>(44%)    | -<br>(44%)     | -<br>(32%)     | -<br>(46%)     |
| <b>RxnScribe</b>                  | -<br>(66%)   | -<br>(66%)   | -<br>(88%)            | -<br>(87%)                      | -<br>(90%)    | -<br>(93%)     | -<br>(97%)    | -<br>(98%)     | -<br>(99%)     | -<br>(99%)     |

12

13

14 **Table S5.** Hard and soft match % specificity of electrosynthesis reaction diagram parsing across different MLLMs without any visual prompting.  
 15 ‘Not applicable (NA)’ is indicated when there are no instances in the figure or when there is a division by zero error. Each model prediction was  
 16 assigned as follows: true positive for correct identification of reaction parameter; false positive for incorrect assignment or redundant information;  
 17 true negative for correct identification of unspecified reaction parameters; and false negative for missing information.

|                                   | Specificity |                |                       |                                |          |                |                |                |                |                |
|-----------------------------------|-------------|----------------|-----------------------|--------------------------------|----------|----------------|----------------|----------------|----------------|----------------|
|                                   | Anode (+)   | Cathode (-)    | Electrolyte/additives | Electrolytes/additives amounts | Solvents | Solvent amount | Current        | Duration       | Air/Inert      | Temperature    |
| <b>GPT-4V</b>                     | N.A.        | 100%<br>(100%) | 100%<br>(100%)        | 100%<br>(100%)                 | N.A.     | 100%<br>(100%) | 90%<br>(100%)  | 100%<br>(100%) | 100%<br>(100%) | 100%<br>(100%) |
| <b>Gemini</b>                     | N.A.        | 100%<br>(100%) | 50%<br>(100%)         | 93%<br>(90%)                   | N.A.     | 96%<br>(91%)   | 100%<br>(100%) | 100%<br>(100%) | 100%<br>(98%)  | 100%<br>(100%) |
| <b>Claude 3</b>                   | N.A.        | 100%<br>(100%) | 50%<br>(50%)          | 69%<br>(69%)                   | N.A.     | 89%<br>(85%)   | 100%<br>(100%) | 100%<br>(100%) | 100%<br>(100%) | 100%<br>(100%) |
| <b>LLaVA</b>                      | N.A.        | 0%<br>(0%)     | 0%<br>(0%)            | 43%<br>(43%)                   | N.A.     | 53%<br>(53%)   | 90%<br>(90%)   | 85%<br>(85%)   | 83%<br>(83%)   | 88%<br>(88%)   |
| <b>InternVL</b>                   | N.A.        | 0%<br>(0%)     | 100%<br>(100%)        | 40%<br>(40%)                   | N.A.     | 44%<br>(44%)   | 60%<br>(60%)   | 70%<br>(73%)   | 69%<br>(69%)   | 75%<br>(75%)   |
| <b>ReactionData Extractor 2.0</b> | N.A.        | -<br>(100%)    | -<br>(50%)            | -<br>(27%)                     | N.A.     | -<br>(32%)     | -<br>(60%)     | -<br>(42%)     | -<br>(33%)     | -<br>(71%)     |
| <b>RxnScribe</b>                  | N.A.        | -<br>(100%)    | -<br>(100%)           | -<br>(93%)                     | N.A.     | -<br>(91%)     | -<br>(100%)    | -<br>(100%)    | -<br>(98%)     | -<br>(99%)     |



19 **Table S6.** Hard match % identification accuracy of electrosynthesis reaction diagram parsing  
20 using GPT-4V, with and without the integration of different single-shot visual prompts.

|                                        | Zero-shot<br>(no<br>prompting) | Single-shot visual prompts |                    |                    |               |
|----------------------------------------|--------------------------------|----------------------------|--------------------|--------------------|---------------|
|                                        |                                | Style<br>1<br>only         | Style<br>2<br>only | Style<br>3<br>only | All<br>styles |
| <b>Anode</b>                           | 85%                            | 96%                        | 96%                | 93%                | 99%           |
| <b>Cathode</b>                         | 85%                            | 98%                        | 96%                | 93%                | 99%           |
| <b>Electrolyte/<br/>additive</b>       | 89%                            | 100%                       | 98%                | 99%                | 100%          |
| <b>Electrolyte/additive<br/>amount</b> | 89%                            | 100%                       | 100%               | 99%                | 100%          |
| <b>Solvents</b>                        | 94%                            | 100%                       | 93%                | 100%               | 100%          |
| <b>Solvent amounts</b>                 | 94%                            | 100%                       | 100%               | 100%               | 100%          |
| <b>Current</b>                         | 99%                            | 100%                       | 100%               | 100%               | 100%          |
| <b>Duration</b>                        | 100%                           | 100%                       | 100%               | 99%                | 100%          |
| <b>Air/inert</b>                       | 100%                           | 100%                       | 100%               | 100%               | 100%          |
| <b>Temperature</b>                     | 100%                           | 100%                       | 100%               | 100%               | 100%          |

21

22

23 **Table S7.** Hard match % identification accuracy for electrode materials across the four  
 24 presentation styles with and without the integration of different single-shot visual prompts.

|                          | Zero-shot (no prompting) | Single-shot visual prompts |              |              |            |
|--------------------------|--------------------------|----------------------------|--------------|--------------|------------|
|                          |                          | Style 1 only               | Style 2 only | Style 3 only | All styles |
| <b>Anode (style 1)</b>   | 100%                     | 100%                       | 100%         | 100%         | 100%       |
| <b>Cathode (style 1)</b> | 92%                      | 100%                       | 100%         | 100%         | 100%       |
| <b>Anode (style 2)</b>   | 100%                     | 100%                       | 100%         | 96%          | 100%       |
| <b>Cathode (style 2)</b> | 100%                     | 100%                       | 100%         | 96%          | 100%       |
| <b>Anode (style 3)</b>   | 75%                      | 98%                        | 95%          | 98%          | 100%       |
| <b>Cathode (style 3)</b> | 78%                      | 100%                       | 95%          | 98%          | 100%       |
| <b>Anode (style 4)</b>   | 70%                      | 80%                        | 90%          | 90%          | 89%        |
| <b>Cathode (style 4)</b> | 70%                      | 80%                        | 89%          | 89%          | 89%        |

25 In the absence of single-shot visual prompts, analysis of GPT-4V’s responses underscores its  
 26 struggle to handle more specialized chemical tasks wherein the presentation style significantly  
 27 deviates from standard norm, despite including pre-conditioning textual prompts. For an  
 28 example figure whereby the model returns “N.R.” for the two electrode materials, the provided  
 29 explanation is as follows: “The image provided does not depict a standard electrolysis reaction  
 30 scheme or its typical conditions; instead, it shows a chemical reaction scheme. Therefore, it  
 31 does not contain specific information about electrolysis conditions such as anode or cathode  
 32 material, current, or duration.”

33 **Table S8.** Precision, recall, F1 scores, specificity, and accuracy of each figure without image  
 34 cropping: resolving footnote cross-references using GPT-4V. ‘Not applicable (NA)’ is indicated  
 35 when there are no instances in the figure or when there is a division by zero error.

| <b>Feeding entire figure</b> |                  |               |           |                    |                 |
|------------------------------|------------------|---------------|-----------|--------------------|-----------------|
| <b>Figure</b>                | <b>Precision</b> | <b>Recall</b> | <b>F1</b> | <b>Specificity</b> | <b>Accuracy</b> |
| 1.                           | 100%             | 100%          | 100%      | 100%               | 100%            |
| 2.                           | 100%             | 100%          | 100%      | 100%               | 100%            |
| 3.                           | 0%               | 0%            | NA        | NA                 | 0%              |
| 4.                           | 100%             | 100%          | 100%      | 100%               | 100%            |
| 5.                           | NA               | NA            | NA        | 100%               | 100%            |
| 6.                           | NA               | NA            | NA        | 100%               | 100%            |
| 7.                           | 50%              | 50%           | 50%       | 100%               | 83%             |
| 8.                           | 19%              | 16%           | 18%       | NA                 | 16%             |
| 9.                           | 100%             | 100%          | 100%      | 100%               | 100%            |
| 10.                          | 100%             | 100%          | 100%      | 100%               | 100%            |
| 11.                          | 100%             | 100%          | 100%      | 100%               | 100%            |
| 12.                          | NA               | NA            | NA        | 100%               | 100%            |
| 13.                          | 67%              | 100%          | 80%       | 100%               | 100%            |
| 14.                          | NA               | NA            | NA        | 100%               | 100%            |
| 15.                          | NA               | NA            | NA        | 100%               | 100%            |
| 16.                          | 100%             | 90%           | 95%       | 96%                | 95%             |
| 17.                          | 67%              | 100%          | 80%       | 100%               | 100%            |
| 18.                          | NA               | NA            | NA        | 100%               | 100%            |
| 19.                          | 75%              | 100%          | 86%       | 89%                | 91%             |
| 20.                          | 100%             | 100%          | 100%      | 100%               | 100%            |
| 21.                          | 100%             | 100%          | 100%      | 100%               | 100%            |
| 22.                          | 100%             | 100%          | 100%      | 100%               | 100%            |
| 23.                          | 100%             | 100%          | 100%      | 100%               | 100%            |
| 24.                          | 100%             | 100%          | 100%      | 100%               | 100%            |
| 25.                          | 83%              | 71%           | 77%       | 100%               | 92%             |
| 26.                          | 100%             | 100%          | 100%      | 100%               | 100%            |
| 27.                          | 100%             | 100%          | 100%      | 100%               | 100%            |
| 28.                          | 100%             | 100%          | 100%      | 100%               | 100%            |
| 29.                          | 100%             | 100%          | 100%      | 100%               | 100%            |
| 30.                          | 100%             | 100%          | 100%      | 100%               | 100%            |
| 31.                          | 125%             | 100%          | 111%      | 100%               | 100%            |
| 32.                          | 100%             | 100%          | 100%      | 100%               | 100%            |
| 33.                          | 80%              | 67%           | 73%       | 96%                | 86%             |
| 34.                          | NA               | NA            | NA        | 100%               | 100%            |
| 35.                          | 94%              | 100%          | 97%       | 100%               | 100%            |
| 36.                          | 67%              | 67%           | 67%       | NA                 | 67%             |
| 37.                          | 83%              | 88%           | 86%       | 86%                | 87%             |
| 38.                          | 100%             | 100%          | 100%      | 100%               | 100%            |

|     |      |      |      |      |      |
|-----|------|------|------|------|------|
| 39. | 100% | 100% | 100% | 100% | 100% |
| 40. | 100% | 100% | 100% | 100% | 100% |
| 41. | 100% | 100% | 100% | 100% | 100% |
| 42. | 100% | 100% | 100% | 100% | 100% |
| 43. | 87%  | 87%  | 87%  | 100% | 92%  |
| 44. | NA   | NA   | NA   | 100% | 100% |
| 45. | NA   | NA   | NA   | 100% | 100% |
| 46. | 17%  | 18%  | 17%  | 90%  | 52%  |
| 47. | 83%  | 83%  | 83%  | 94%  | 92%  |
| 48. | 100% | 100% | 100% | 100% | 100% |
| 49. | 100% | 100% | 100% | 100% | 100% |
| 50. | 75%  | 75%  | 75%  | 97%  | 94%  |
| 51. | NA   | NA   | NA   | 100% | 100% |
| 52. | 100% | 100% | 100% | 88%  | 93%  |
| 53. | 100% | 100% | 100% | 100% | 100% |
| 54. | 100% | 100% | 100% | 100% | 100% |
| 55. | 67%  | 75%  | 71%  | 97%  | 93%  |
| 56. | 100% | 100% | 100% | 92%  | 94%  |
| 57. | 100% | 100% | 100% | 100% | 100% |
| 58. | NA   | NA   | NA   | 100% | 100% |
| 59. | NA   | NA   | NA   | 100% | 100% |
| 60. | 100% | 100% | 100% | 100% | 100% |
| 61. | 19%  | 18%  | 19%  | NA   | 18%  |
| 62. | 100% | 100% | 100% | 100% | 100% |
| 63. | 100% | 100% | 100% | 100% | 100% |
| 64. | 100% | 100% | 100% | 100% | 100% |
| 65. | 67%  | 67%  | 67%  | 100% | 94%  |
| 66. | 100% | 100% | 100% | 100% | 100% |
| 67. | 100% | 100% | 100% | 100% | 100% |
| 68. | 83%  | 100% | 91%  | 100% | 100% |
| 69. | 100% | 100% | 100% | 100% | 100% |
| 70. | 100% | 100% | 100% | 100% | 100% |
| 71. | 113% | 100% | 106% | 100% | 100% |
| 72. | 67%  | 100% | 80%  | 77%  | 84%  |
| 73. | 100% | 100% | 100% | 100% | 100% |
| 74. | 100% | 100% | 100% | 100% | 100% |

37 **Table S9.** Precision, recall, F1 scores, specificity, and accuracy of each figure with image  
 38 cropping: resolving footnote cross-references using GPT-4V. ‘Not applicable (NA)’ is indicated  
 39 when there are no instances in the figure or when there is a division by zero error.

| <b>With image cropping</b> |                  |               |           |                    |                 |
|----------------------------|------------------|---------------|-----------|--------------------|-----------------|
| <b>Figure</b>              | <b>Precision</b> | <b>Recall</b> | <b>F1</b> | <b>Specificity</b> | <b>Accuracy</b> |
| 1.                         | 100%             | 100%          | 100%      | 100%               | 100%            |
| 2.                         | 100%             | 100%          | 100%      | 100%               | 100%            |
| 3.                         | 100%             | 100%          | 100%      | NA                 | 100%            |
| 4.                         | 100%             | 100%          | 100%      | 100%               | 100%            |
| 5.                         | NA               | NA            | NA        | 100%               | 100%            |
| 6.                         | NA               | NA            | NA        | 100%               | 100%            |
| 7.                         | 100%             | 100%          | 100%      | 100%               | 100%            |
| 8.                         | 100%             | 84%           | 91%       | NA                 | 84%             |
| 9.                         | 100%             | 100%          | 100%      | 100%               | 100%            |
| 10.                        | 100%             | 100%          | 100%      | 100%               | 100%            |
| 11.                        | 100%             | 100%          | 100%      | 100%               | 100%            |
| 12.                        | NA               | NA            | NA        | 100%               | 100%            |
| 13.                        | 67%              | 100%          | 80%       | 91%                | 92%             |
| 14.                        | NA               | NA            | NA        | 100%               | 100%            |
| 15.                        | NA               | NA            | NA        | 100%               | 100%            |
| 16.                        | 89%              | 80%           | 84%       | 96%                | 92%             |
| 17.                        | 67%              | 100%          | 80%       | 95%                | 96%             |
| 18.                        | NA               | NA            | NA        | 100%               | 100%            |
| 19.                        | 75%              | 100%          | 86%       | 95%                | 95%             |
| 20.                        | 100%             | 100%          | 100%      | 100%               | 100%            |
| 21.                        | 100%             | 100%          | 100%      | 100%               | 100%            |
| 22.                        | 100%             | 100%          | 100%      | 100%               | 100%            |
| 23.                        | 100%             | 100%          | 100%      | 100%               | 100%            |
| 24.                        | 100%             | 100%          | 100%      | 100%               | 100%            |
| 25.                        | 100%             | 86%           | 92%       | 100%               | 96%             |
| 26.                        | 100%             | 100%          | 100%      | 100%               | 100%            |
| 27.                        | 100%             | 100%          | 100%      | 100%               | 100%            |
| 28.                        | 100%             | 100%          | 100%      | 100%               | 100%            |
| 29.                        | 100%             | 100%          | 100%      | 100%               | 100%            |
| 30.                        | 100%             | 100%          | 100%      | 100%               | 100%            |
| 31.                        | 100%             | 80%           | 89%       | 100%               | 95%             |
| 32.                        | 100%             | 100%          | 100%      | 100%               | 100%            |
| 33.                        | 100%             | 83%           | 91%       | 100%               | 94%             |
| 34.                        | NA               | NA            | NA        | 100%               | 100%            |
| 35.                        | 94%              | 100%          | 97%       | 96%                | 98%             |
| 36.                        | 100%             | 100%          | 100%      | NA                 | 100%            |
| 37.                        | 83%              | 88%           | 86%       | 86%                | 87%             |
| 38.                        | 100%             | 100%          | 100%      | 100%               | 100%            |

|     |      |      |      |      |      |
|-----|------|------|------|------|------|
| 39. | 100% | 100% | 100% | 100% | 100% |
| 40. | 100% | 100% | 100% | 100% | 100% |
| 41. | 100% | 100% | 100% | 100% | 100% |
| 42. | 100% | 100% | 100% | 100% | 100% |
| 43. | 100% | 100% | 100% | 100% | 100% |
| 44. | NA   | NA   | NA   | 100% | 100% |
| 45. | NA   | NA   | NA   | 100% | 100% |
| 46. | 75%  | 82%  | 78%  | 70%  | 76%  |
| 47. | 100% | 100% | 100% | 100% | 100% |
| 48. | 100% | 100% | 100% | 100% | 100% |
| 49. | 100% | 100% | 100% | 100% | 100% |
| 50. | 100% | 100% | 100% | 100% | 100% |
| 51. | NA   | NA   | NA   | 100% | 100% |
| 52. | 100% | 100% | 100% | 100% | 100% |
| 53. | 100% | 100% | 100% | 100% | 100% |
| 54. | 100% | 100% | 100% | 100% | 100% |
| 55. | 89%  | 100% | 94%  | 97%  | 98%  |
| 56. | 100% | 100% | 100% | 100% | 100% |
| 57. | 100% | 100% | 100% | 100% | 100% |
| 58. | NA   | NA   | NA   | 100% | 100% |
| 59. | NA   | NA   | NA   | 100% | 100% |
| 60. | 100% | 100% | 100% | 100% | 100% |
| 61. | 100% | 97%  | 99%  | NA   | 97%  |
| 62. | 100% | 100% | 100% | 100% | 100% |
| 63. | 100% | 100% | 100% | 100% | 100% |
| 64. | 100% | 100% | 100% | 100% | 100% |
| 65. | 100% | 100% | 100% | 100% | 100% |
| 66. | 100% | 100% | 100% | 100% | 100% |
| 67. | 100% | 100% | 100% | 100% | 100% |
| 68. | 83%  | 100% | 91%  | 89%  | 93%  |
| 69. | 100% | 100% | 100% | 100% | 100% |
| 70. | 100% | 100% | 100% | 100% | 100% |
| 71. | 100% | 89%  | 94%  | 100% | 94%  |
| 72. | 67%  | 100% | 80%  | 77%  | 84%  |
| 73. | 100% | 100% | 100% | 100% | 100% |
| 74. | 100% | 100% | 100% | 100% | 100% |

41 **Table S10.** Precision, recall, F1 scores, specificity, and accuracy of each figure with image  
 42 cropping: resolving footnote cross-references using Gemini. ‘Not applicable (NA)’ is indicated  
 43 when there are no instances in the figure or when there is a division by zero error.

| Figure | Precision | Recall | F1   | Specificity | Accuracy |
|--------|-----------|--------|------|-------------|----------|
| 1.     | 100%      | 50%    | 67%  | 100%        | 92%      |
| 2.     | 100%      | 100%   | 100% | 100%        | 100%     |
| 3.     | NA        | 0%     | NA   | NA          | 0%       |
| 4.     | 100%      | 100%   | 100% | 100%        | 100%     |
| 5.     | NA        | NA     | NA   | 100%        | 100%     |
| 6.     | NA        | NA     | NA   | 100%        | 100%     |
| 7.     | NA        | 0%     | NA   | 100%        | 67%      |
| 8.     | 100%      | 6%     | 12%  | NA          | 6%       |
| 9.     | 9%        | 100%   | 17%  | 63%         | 64%      |
| 10.    | 100%      | 100%   | 100% | 100%        | 100%     |
| 11.    | 77%       | 100%   | 87%  | 88%         | 91%      |
| 12.    | NA        | NA     | NA   | 100%        | 100%     |
| 13.    | 0%        | 0%     | NA   | 91%         | 77%      |
| 14.    | NA        | NA     | NA   | 100%        | 100%     |
| 15.    | NA        | NA     | NA   | 100%        | 100%     |
| 16.    | 100%      | 70%    | 82%  | 100%        | 92%      |
| 17.    | 100%      | 100%   | 100% | 100%        | 100%     |
| 18.    | NA        | NA     | NA   | 100%        | 100%     |
| 19.    | 75%       | 100%   | 86%  | 95%         | 95%      |
| 20.    | NA        | 0%     | NA   | 100%        | 67%      |
| 21.    | 100%      | 100%   | 100% | 100%        | 100%     |
| 22.    | 100%      | 60%    | 75%  | 100%        | 90%      |
| 23.    | 100%      | 100%   | 100% | 100%        | 100%     |
| 24.    | 100%      | 29%    | 44%  | 100%        | 67%      |
| 25.    | 100%      | 43%    | 60%  | 100%        | 83%      |
| 26.    | 60%       | 100%   | 75%  | 88%         | 90%      |
| 27.    | 100%      | 67%    | 80%  | 100%        | 72%      |
| 28.    | 100%      | 20%    | 33%  | 100%        | 60%      |
| 29.    | 100%      | 75%    | 86%  | 100%        | 94%      |
| 30.    | 100%      | 75%    | 86%  | 100%        | 83%      |
| 31.    | 100%      | 40%    | 57%  | 100%        | 86%      |
| 32.    | 100%      | 33%    | 50%  | 100%        | 88%      |
| 33.    | 100%      | 17%    | 29%  | 100%        | 71%      |
| 34.    | NA        | 0%     | NA   | 100%        | 82%      |
| 35.    | 85%       | 69%    | 76%  | 92%         | 83%      |
| 36.    | 100%      | 100%   | 100% | NA          | 100%     |
| 37.    | 100%      | 100%   | 100% | 100%        | 100%     |
| 38.    | 100%      | 100%   | 100% | 100%        | 100%     |
| 39.    | 100%      | 100%   | 100% | 100%        | 100%     |

|     |      |      |      |      |      |
|-----|------|------|------|------|------|
| 40. | 75%  | 100% | 86%  | 93%  | 94%  |
| 41. | 67%  | 100% | 80%  | 92%  | 93%  |
| 42. | 83%  | 100% | 91%  | 95%  | 96%  |
| 43. | 94%  | 100% | 97%  | 89%  | 96%  |
| 44. | NA   | NA   | NA   | 100% | 100% |
| 45. | NA   | NA   | NA   | 100% | 100% |
| 46. | 56%  | 45%  | 50%  | 60%  | 52%  |
| 47. | 50%  | 33%  | 40%  | 89%  | 75%  |
| 48. | 100% | 100% | 100% | 100% | 100% |
| 49. | 89%  | 100% | 94%  | 96%  | 97%  |
| 50. | 100% | 100% | 100% | 100% | 100% |
| 51. | NA   | NA   | NA   | 100% | 100% |
| 52. | 100% | 14%  | 25%  | 100% | 60%  |
| 53. | 80%  | 80%  | 80%  | 95%  | 92%  |
| 54. | 100% | 100% | 100% | 100% | 100% |
| 55. | 89%  | 100% | 94%  | 97%  | 98%  |
| 56. | 50%  | 67%  | 57%  | 67%  | 67%  |
| 57. | 100% | 67%  | 80%  | 100% | 95%  |
| 58. | NA   | NA   | NA   | 100% | 100% |
| 59. | NA   | NA   | NA   | 100% | 100% |
| 60. | 100% | 100% | 100% | 100% | 100% |
| 61. | 100% | 42%  | 59%  | NA   | 42%  |
| 62. | 100% | 100% | 100% | 100% | 100% |
| 63. | 100% | 69%  | 82%  | 100% | 86%  |
| 64. | 75%  | 86%  | 80%  | 91%  | 90%  |
| 65. | 100% | 100% | 100% | 100% | 100% |
| 66. | 100% | 100% | 100% | 100% | 100% |
| 67. | 100% | 75%  | 86%  | 100% | 88%  |
| 68. | NA   | 0%   | NA   | 100% | 64%  |
| 69. | 100% | 100% | 100% | 100% | 100% |
| 70. | 100% | 100% | 100% | 100% | 100% |
| 71. | 100% | 78%  | 88%  | 100% | 88%  |
| 72. | 43%  | 43%  | 43%  | 67%  | 58%  |
| 73. | 100% | 100% | 100% | 100% | 100% |
| 74. | 100% | 100% | 100% | 100% | 100% |



45 **Table S11.** Precision, recall, F1 scores, specificity, and accuracy of each figure with image  
 46 cropping: resolving footnote cross-references using Claude 3. ‘Not applicable (NA)’ is  
 47 indicated when there are no instances in the figure or when there is a division by zero error.

| Figure | Precision | Recall | F1   | Specificity | Accuracy |
|--------|-----------|--------|------|-------------|----------|
| 1.     | 100%      | 100%   | 100% | 100%        | 100%     |
| 2.     | 71%       | 100%   | 83%  | 91%         | 93%      |
| 3.     | 100%      | 94%    | 97%  | NA          | 94%      |
| 4.     | 50%       | 100%   | 67%  | 93%         | 94%      |
| 5.     | NA        | NA     | NA   | 100%        | 100%     |
| 6.     | NA        | NA     | NA   | 100%        | 100%     |
| 7.     | 100%      | 100%   | 100% | 100%        | 100%     |
| 8.     | 100%      | 81%    | 89%  | NA          | 81%      |
| 9.     | 100%      | 100%   | 100% | 100%        | 100%     |
| 10.    | 100%      | 100%   | 100% | 100%        | 100%     |
| 11.    | 77%       | 100%   | 87%  | 88%         | 91%      |
| 12.    | NA        | NA     | NA   | 100%        | 100%     |
| 13.    | 67%       | 100%   | 80%  | 91%         | 92%      |
| 14.    | NA        | NA     | NA   | 100%        | 100%     |
| 15.    | NA        | NA     | NA   | 100%        | 100%     |
| 16.    | 89%       | 80%    | 84%  | 96%         | 92%      |
| 17.    | 100%      | 100%   | 100% | 100%        | 100%     |
| 18.    | NA        | NA     | NA   | 100%        | 100%     |
| 19.    | 100%      | 100%   | 100% | 100%        | 100%     |
| 20.    | 36%       | 100%   | 53%  | 10%         | 40%      |
| 21.    | 67%       | 100%   | 80%  | 75%         | 83%      |
| 22.    | 100%      | 100%   | 100% | 100%        | 100%     |
| 23.    | 100%      | 100%   | 100% | 100%        | 100%     |
| 24.    | 100%      | 100%   | 100% | 100%        | 100%     |
| 25.    | 75%       | 86%    | 80%  | 88%         | 88%      |
| 26.    | 60%       | 100%   | 75%  | 88%         | 90%      |
| 27.    | 100%      | 93%    | 97%  | 100%        | 94%      |
| 28.    | 90%       | 90%    | 90%  | 90%         | 90%      |
| 29.    | 75%       | 75%    | 75%  | 92%         | 88%      |
| 30.    | 100%      | 100%   | 100% | 100%        | 100%     |
| 31.    | 100%      | 100%   | 100% | 100%        | 100%     |
| 32.    | 100%      | 100%   | 100% | 100%        | 100%     |
| 33.    | 100%      | 92%    | 96%  | 100%        | 97%      |
| 34.    | 100%      | 100%   | 100% | 100%        | 100%     |
| 35.    | 100%      | 100%   | 100% | 100%        | 100%     |
| 36.    | 100%      | 100%   | 100% | NA          | 100%     |
| 37.    | 85%       | 100%   | 92%  | 86%         | 92%      |
| 38.    | 100%      | 100%   | 100% | 100%        | 100%     |
| 39.    | 100%      | 100%   | 100% | 100%        | 100%     |

|     |      |      |      |      |      |
|-----|------|------|------|------|------|
| 40. | 100% | 100% | 100% | 100% | 100% |
| 41. | 18%  | 100% | 31%  | 31%  | 40%  |
| 42. | 80%  | 80%  | 80%  | 95%  | 92%  |
| 43. | 100% | 100% | 100% | 100% | 100% |
| 44. | NA   | NA   | NA   | 100% | 100% |
| 45. | 0%   | NA   | NA   | 88%  | 88%  |
| 46. | 75%  | 27%  | 40%  | 90%  | 57%  |
| 47. | 100% | 100% | 100% | 100% | 100% |
| 48. | 50%  | 100% | 67%  | 94%  | 94%  |
| 49. | 100% | 100% | 100% | 100% | 100% |
| 50. | 80%  | 100% | 89%  | 97%  | 97%  |
| 51. | NA   | NA   | NA   | 100% | 100% |
| 52. | 100% | 71%  | 83%  | 100% | 87%  |
| 53. | 100% | 100% | 100% | 100% | 100% |
| 54. | 100% | 100% | 100% | 100% | 100% |
| 55. | 100% | 100% | 100% | 100% | 100% |
| 56. | 100% | 83%  | 91%  | 100% | 94%  |
| 57. | 100% | 100% | 100% | 100% | 100% |
| 58. | NA   | NA   | NA   | 100% | 100% |
| 59. | NA   | NA   | NA   | 100% | 100% |
| 60. | 100% | 100% | 100% | 100% | 100% |
| 61. | 100% | 29%  | 45%  | NA   | 29%  |
| 62. | 100% | 100% | 100% | 100% | 100% |
| 63. | 100% | 85%  | 92%  | 100% | 93%  |
| 64. | 100% | 100% | 100% | 100% | 100% |
| 65. | 100% | 67%  | 80%  | 100% | 94%  |
| 66. | 100% | 100% | 100% | 100% | 100% |
| 67. | 100% | 75%  | 86%  | 100% | 88%  |
| 68. | 100% | 40%  | 57%  | 100% | 79%  |
| 69. | 100% | 100% | 100% | 100% | 100% |
| 70. | 100% | 92%  | 96%  | 100% | 96%  |
| 71. | 80%  | 89%  | 84%  | 71%  | 81%  |
| 72. | 100% | 100% | 100% | 100% | 100% |
| 73. | 100% | 67%  | 80%  | 100% | 88%  |
| 74. | 100% | 100% | 100% | 100% | 100% |

49 **Table S12.** Precision, recall, F1 scores, specificity, and accuracy of each figure with image  
50 cropping: resolving footnote cross-references using LLaVA. ‘Not applicable (NA)’ is indicated  
51 when there are no instances in the figure or when there is a division by zero error.

| Figure | Precision | Recall | F1  | Specificity | Accuracy |
|--------|-----------|--------|-----|-------------|----------|
| 1.     | NA        | 0%     | NA  | 100%        | 85%      |
| 2.     | 0%        | 0%     | NA  | 35%         | 29%      |
| 3.     | 100%      | 19%    | 32% | NA          | 19%      |
| 4.     | NA        | 0%     | NA  | 100%        | 94%      |
| 5.     | NA        | NA     | NA  | 100%        | 100%     |
| 6.     | NA        | NA     | NA  | 100%        | 100%     |
| 7.     | 0%        | 0%     | NA  | 40%         | 27%      |
| 8.     | NA        | 0%     | NA  | NA          | 0%       |
| 9.     | 0%        | 0%     | NA  | 0%          | 0%       |
| 10.    | NA        | 0%     | NA  | 100%        | 88%      |
| 11.    | NA        | 0%     | NA  | 100%        | 71%      |
| 12.    | 0%        | NA     | NA  | 0%          | 0%       |
| 13.    | NA        | 0%     | NA  | 100%        | 85%      |
| 14.    | NA        | NA     | NA  | 100%        | 100%     |
| 15.    | 0%        | NA     | NA  | 47%         | 47%      |
| 16.    | NA        | 0%     | NA  | 100%        | 74%      |
| 17.    | 0%        | 0%     | NA  | 45%         | 42%      |
| 18.    | 0%        | NA     | NA  | 41%         | 41%      |
| 19.    | NA        | 0%     | NA  | 100%        | 86%      |
| 20.    | NA        | 0%     | NA  | 100%        | 67%      |
| 21.    | NA        | 0%     | NA  | 100%        | 67%      |
| 22.    | NA        | 0%     | NA  | 100%        | 80%      |
| 23.    | NA        | 0%     | NA  | 100%        | 70%      |
| 24.    | 0%        | 0%     | NA  | 38%         | 20%      |
| 25.    | 0%        | 0%     | NA  | 35%         | 25%      |
| 26.    | NA        | 0%     | NA  | 100%        | 85%      |
| 27.    | 100%      | 40%    | 57% | 100%        | 50%      |
| 28.    | NA        | 0%     | NA  | 100%        | 50%      |
| 29.    | NA        | 0%     | NA  | 100%        | 75%      |
| 30.    | 100%      | 75%    | 86% | 100%        | 83%      |
| 31.    | NA        | 0%     | NA  | 100%        | 77%      |
| 32.    | 0%        | 0%     | NA  | 79%         | 65%      |
| 33.    | 0%        | 0%     | NA  | 61%         | 40%      |
| 34.    | 0%        | 0%     | NA  | 50%         | 41%      |
| 35.    | 100%      | 6%     | 12% | 100%        | 63%      |
| 36.    | NA        | 0%     | NA  | NA          | 0%       |
| 37.    | 0%        | 0%     | NA  | 82%         | 46%      |
| 38.    | NA        | 0%     | NA  | 100%        | 91%      |
| 39.    | NA        | 0%     | NA  | 100%        | 50%      |

|     |      |      |      |      |      |
|-----|------|------|------|------|------|
| 40. | NA   | 0%   | NA   | 100% | 82%  |
| 41. | 0%   | 0%   | NA   | 38%  | 33%  |
| 42. | 0%   | 0%   | NA   | 29%  | 23%  |
| 43. | 43%  | 20%  | 27%  | 56%  | 33%  |
| 44. | 0%   | NA   | NA   | 56%  | 56%  |
| 45. | NA   | NA   | NA   | 100% | 100% |
| 46. | 0%   | 0%   | NA   | 0%   | 0%   |
| 47. | 0%   | 0%   | NA   | 72%  | 54%  |
| 48. | 0%   | 0%   | NA   | 94%  | 89%  |
| 49. | 0%   | 0%   | NA   | 0%   | 0%   |
| 50. | 5%   | 25%  | 8%   | 28%  | 27%  |
| 51. | NA   | NA   | NA   | 100% | 100% |
| 52. | 0%   | 0%   | NA   | 0%   | 0%   |
| 53. | NA   | 0%   | NA   | 100% | 79%  |
| 54. | 0%   | 0%   | NA   | 94%  | 71%  |
| 55. | 0%   | 0%   | NA   | 89%  | 73%  |
| 56. | NA   | 0%   | NA   | 100% | 67%  |
| 57. | 0%   | 0%   | NA   | 78%  | 67%  |
| 58. | 0%   | NA   | NA   | 29%  | 29%  |
| 59. | 0%   | NA   | NA   | 92%  | 92%  |
| 60. | 0%   | 0%   | NA   | 35%  | 33%  |
| 61. | NA   | 0%   | NA   | NA   | 0%   |
| 62. | NA   | 0%   | NA   | 100% | 79%  |
| 63. | 0%   | 0%   | NA   | 73%  | 39%  |
| 64. | NA   | 0%   | NA   | 100% | 76%  |
| 65. | NA   | 0%   | NA   | 100% | 83%  |
| 66. | NA   | 0%   | NA   | 100% | 67%  |
| 67. | NA   | 0%   | NA   | 100% | 50%  |
| 68. | NA   | 0%   | NA   | 100% | 64%  |
| 69. | NA   | 0%   | NA   | 100% | 63%  |
| 70. | 100% | 100% | 100% | 100% | 100% |
| 71. | NA   | 0%   | NA   | 100% | 44%  |
| 72. | 0%   | 0%   | NA   | 69%  | 47%  |
| 73. | 0%   | 0%   | NA   | 0%   | 0%   |
| 74. | 0%   | 0%   | NA   | 75%  | 71%  |

53 **Table S13.** Precision, recall, F1 scores, specificity, and accuracy of each figure with image  
54 cropping: resolving footnote cross-references using InternVL. ‘Not applicable (NA)’ is  
55 indicated when there are no instances in the figure or when there is a division by zero error.

| Figure | Precision | Recall | F1   | Specificity | Accuracy |
|--------|-----------|--------|------|-------------|----------|
| 1.     | NA        | 0%     | NA   | 100%        | 85%      |
| 2.     | NA        | 0%     | NA   | 100%        | 82%      |
| 3.     | NA        | 0%     | NA   | NA          | 0%       |
| 4.     | 0%        | 0%     | NA   | 67%         | 63%      |
| 5.     | NA        | NA     | NA   | 100%        | 100%     |
| 6.     | NA        | NA     | NA   | 100%        | 100%     |
| 7.     | 0%        | 0%     | NA   | 80%         | 53%      |
| 8.     | 100%      | 3%     | 6%   | NA          | 3%       |
| 9.     | 0%        | 0%     | NA   | 0%          | 0%       |
| 10.    | 0%        | 0%     | NA   | 0%          | 0%       |
| 11.    | 0%        | 0%     | NA   | 80%         | 57%      |
| 12.    | 0%        | NA     | NA   | 0%          | 0%       |
| 13.    | 0%        | 0%     | NA   | 55%         | 46%      |
| 14.    | NA        | NA     | NA   | 100%        | 100%     |
| 15.    | 0%        | NA     | NA   | 0%          | 0%       |
| 16.    | NA        | 0%     | NA   | 100%        | 74%      |
| 17.    | 0%        | 0%     | NA   | 0%          | 0%       |
| 18.    | 0%        | NA     | NA   | 41%         | 41%      |
| 19.    | 0%        | 0%     | NA   | 32%         | 27%      |
| 20.    | 100%      | 80%    | 89%  | 100%        | 93%      |
| 21.    | NA        | 0%     | NA   | 100%        | 67%      |
| 22.    | 0%        | 0%     | NA   | 63%         | 48%      |
| 23.    | 0%        | 0%     | NA   | 29%         | 20%      |
| 24.    | 0%        | 0%     | NA   | 0%          | 0%       |
| 25.    | NA        | 0%     | NA   | 100%        | 71%      |
| 26.    | NA        | 0%     | NA   | 100%        | 85%      |
| 27.    | 100%      | 53%    | 70%  | 100%        | 61%      |
| 28.    | NA        | 0%     | NA   | 100%        | 50%      |
| 29.    | NA        | 0%     | NA   | 100%        | 75%      |
| 30.    | 0%        | 0%     | NA   | 0%          | 0%       |
| 31.    | 0%        | 0%     | NA   | 59%         | 45%      |
| 32.    | 0%        | 0%     | NA   | 36%         | 29%      |
| 33.    | 14%       | 8%     | 11%  | 74%         | 51%      |
| 34.    | NA        | 0%     | NA   | 100%        | 82%      |
| 35.    | 8%        | 13%    | 10%  | 8%          | 10%      |
| 36.    | 100%      | 100%   | 100% | NA          | 100%     |
| 37.    | 0%        | 0%     | NA   | 0%          | 0%       |
| 38.    | 0%        | 0%     | NA   | 80%         | 73%      |
| 39.    | 0%        | 0%     | NA   | 0%          | 0%       |

|     |     |     |     |      |      |
|-----|-----|-----|-----|------|------|
| 40. | NA  | 0%  | NA  | 100% | 82%  |
| 41. | NA  | 0%  | NA  | 100% | 87%  |
| 42. | 0%  | 0%  | NA  | 67%  | 54%  |
| 43. | 0%  | 0%  | NA  | 0%   | 0%   |
| 44. | 0%  | NA  | NA  | 0%   | 0%   |
| 45. | NA  | NA  | NA  | 100% | 100% |
| 46. | 0%  | 0%  | NA  | 50%  | 24%  |
| 47. | 0%  | 0%  | NA  | 67%  | 50%  |
| 48. | 0%  | 0%  | NA  | 0%   | 0%   |
| 49. | 0%  | 0%  | NA  | 4%   | 3%   |
| 50. | 3%  | 25% | 6%  | 3%   | 6%   |
| 51. | 0%  | NA  | NA  | 67%  | 67%  |
| 52. | 0%  | 0%  | NA  | 88%  | 47%  |
| 53. | 0%  | 0%  | NA  | 32%  | 25%  |
| 54. | NA  | 0%  | NA  | 100% | 76%  |
| 55. | 0%  | 0%  | NA  | 56%  | 45%  |
| 56. | 0%  | 0%  | NA  | 17%  | 11%  |
| 57. | 0%  | 0%  | NA  | 44%  | 38%  |
| 58. | 0%  | NA  | NA  | 0%   | 0%   |
| 59. | 0%  | NA  | NA  | 77%  | 77%  |
| 60. | 0%  | 0%  | NA  | 0%   | 0%   |
| 61. | NA  | 0%  | NA  | NA   | 0%   |
| 62. | 0%  | 0%  | NA  | 0%   | 0%   |
| 63. | 67% | 15% | 25% | 93%  | 57%  |
| 64. | NA  | 0%  | NA  | 100% | 76%  |
| 65. | 0%  | 0%  | NA  | 80%  | 67%  |
| 66. | 0%  | 0%  | NA  | 0%   | 0%   |
| 67. | NA  | 0%  | NA  | 100% | 50%  |
| 68. | 0%  | 0%  | NA  | 78%  | 50%  |
| 69. | 0%  | 0%  | NA  | 80%  | 50%  |
| 70. | NA  | 0%  | NA  | 100% | 48%  |
| 71. | NA  | 0%  | NA  | 100% | 44%  |
| 72. | NA  | 0%  | NA  | 100% | 63%  |
| 73. | NA  | 0%  | NA  | 100% | 63%  |
| 74. | 0%  | 0%  | NA  | 0%   | 0%   |

57 **Table S14.** Recall scores of each figure with and without image cropping: identifying index-  
 58 yield pairs using GPT-4V. ‘Not applicable (NA)’ is indicated when there are no instances in the  
 59 figure or when there is a division by zero error.

| Figure | Recall<br>(feeding<br>entire figure) | Recall<br>(with image<br>cropping) | Figure | Recall<br>(feeding<br>entire figure) | Recall<br>(with image<br>cropping) |
|--------|--------------------------------------|------------------------------------|--------|--------------------------------------|------------------------------------|
| 1.     | 100%                                 | 100%                               | 38.    | 100%                                 | 100%                               |
| 2.     | 100%                                 | 100%                               | 39.    | 100%                                 | 100%                               |
| 3.     | 0%                                   | 100%                               | 40.    | 100%                                 | 100%                               |
| 4.     | 94%                                  | 100%                               | 41.    | 100%                                 | 100%                               |
| 5.     | 100%                                 | 100%                               | 42.    | 85%                                  | 100%                               |
| 6.     | 100%                                 | 100%                               | 43.    | 100%                                 | 100%                               |
| 7.     | 27%                                  | 100%                               | 44.    | 83%                                  | 94%                                |
| 8.     | 100%                                 | 100%                               | 45.    | 100%                                 | 100%                               |
| 9.     | 100%                                 | 100%                               | 46.    | 38%                                  | 100%                               |
| 10.    | 100%                                 | 100%                               | 47.    | 100%                                 | 100%                               |
| 11.    | 100%                                 | 100%                               | 48.    | 100%                                 | 100%                               |
| 12.    | 100%                                 | 100%                               | 49.    | 100%                                 | 100%                               |
| 13.    | 100%                                 | 100%                               | 50.    | 79%                                  | 100%                               |
| 14.    | 100%                                 | 100%                               | 51.    | 100%                                 | 100%                               |
| 15.    | 100%                                 | 100%                               | 52.    | 100%                                 | 100%                               |
| 16.    | 97%                                  | 89%                                | 53.    | 100%                                 | 100%                               |
| 17.    | 100%                                 | 96%                                | 54.    | 100%                                 | 100%                               |
| 18.    | 100%                                 | 100%                               | 55.    | 100%                                 | 98%                                |
| 19.    | 100%                                 | 100%                               | 56.    | 100%                                 | 100%                               |
| 20.    | 100%                                 | 100%                               | 57.    | 100%                                 | 100%                               |
| 21.    | 100%                                 | 100%                               | 58.    | 100%                                 | 100%                               |
| 22.    | 100%                                 | 100%                               | 59.    | 100%                                 | 100%                               |
| 23.    | 100%                                 | 100%                               | 60.    | 95%                                  | 95%                                |
| 24.    | 100%                                 | 100%                               | 61.    | 45%                                  | 100%                               |
| 25.    | 92%                                  | 100%                               | 62.    | 89%                                  | 100%                               |
| 26.    | 100%                                 | 100%                               | 63.    | 100%                                 | 100%                               |
| 27.    | 89%                                  | 100%                               | 64.    | 97%                                  | 100%                               |
| 28.    | 100%                                 | 95%                                | 65.    | 100%                                 | 100%                               |
| 29.    | 100%                                 | 100%                               | 66.    | 100%                                 | 100%                               |
| 30.    | 100%                                 | 100%                               | 67.    | 100%                                 | 100%                               |
| 31.    | 100%                                 | 95%                                | 68.    | 100%                                 | 100%                               |
| 32.    | 100%                                 | 100%                               | 69.    | 100%                                 | 100%                               |
| 33.    | 97%                                  | 100%                               | 70.    | 100%                                 | 100%                               |
| 34.    | 100%                                 | 100%                               | 71.    | 100%                                 | 100%                               |
| 35.    | 98%                                  | 100%                               | 72.    | 89%                                  | 95%                                |
| 36.    | 78%                                  | 100%                               | 73.    | 100%                                 | 100%                               |
| 37.    | 100%                                 | 100%                               | 74.    | 95%                                  | 95%                                |

60 **Table S15.** Precision, recall, specificity, and F1 scores of each figure without image cropping:  
61 identifying additional substrate-specific information using GPT-4V. ‘Not applicable (NA)’ is  
62 indicated when there are no instances in the figure or when there is a division by zero error.

| <b>Feeding entire figure</b> |                  |               |           |                    |                 |
|------------------------------|------------------|---------------|-----------|--------------------|-----------------|
| <b>Figure</b>                | <b>Precision</b> | <b>Recall</b> | <b>F1</b> | <b>Specificity</b> | <b>Accuracy</b> |
| 1.                           | NA               | NA            | NA        | 100%               | 100%            |
| 2.                           | NA               | NA            | NA        | 100%               | 100%            |
| 3.                           | 100%             | 3%            | 6%        | NA                 | 3%              |
| 4.                           | 100%             | 100%          | 100%      | NA                 | 100%            |
| 5.                           | 100%             | 100%          | 100%      | NA                 | 100%            |
| 6.                           | 100%             | 100%          | 100%      | NA                 | 100%            |
| 7.                           | 100%             | 77%           | 87%       | NA                 | 77%             |
| 8.                           | 100%             | 100%          | 100%      | NA                 | 100%            |
| 9.                           | 96%              | 100%          | 98%       | 50%                | 96%             |
| 10.                          | NA               | NA            | NA        | 100%               | 100%            |
| 11.                          | 100%             | 100%          | 100%      | NA                 | 100%            |
| 12.                          | 100%             | 100%          | 100%      | NA                 | 100%            |
| 13.                          | 100%             | 100%          | 100%      | NA                 | 100%            |
| 14.                          | 100%             | 100%          | 100%      | NA                 | 100%            |
| 15.                          | 100%             | 100%          | 100%      | NA                 | 100%            |
| 16.                          | 100%             | 100%          | 100%      | 100%               | 100%            |
| 17.                          | 100%             | 100%          | 100%      | 100%               | 100%            |
| 18.                          | 100%             | 100%          | 100%      | 100%               | 100%            |
| 19.                          | NA               | NA            | NA        | 100%               | 100%            |
| 20.                          | NA               | NA            | NA        | 100%               | 100%            |
| 21.                          | NA               | NA            | NA        | 100%               | 100%            |
| 22.                          | NA               | NA            | NA        | 100%               | 100%            |
| 23.                          | NA               | NA            | NA        | 100%               | 100%            |
| 24.                          | 100%             | 100%          | 100%      | 100%               | 100%            |
| 25.                          | NA               | NA            | NA        | 100%               | 100%            |
| 26.                          | NA               | NA            | NA        | 100%               | 100%            |
| 27.                          | 100%             | 100%          | 100%      | 100%               | 100%            |
| 28.                          | 100%             | 100%          | 100%      | 100%               | 100%            |
| 29.                          | NA               | NA            | NA        | 100%               | 100%            |
| 30.                          | NA               | NA            | NA        | 100%               | 100%            |
| 31.                          | 100%             | 100%          | 100%      | 100%               | 100%            |
| 32.                          | NA               | NA            | NA        | 100%               | 100%            |
| 33.                          | NA               | NA            | NA        | 100%               | 100%            |
| 34.                          | 100%             | 100%          | 100%      | 100%               | 100%            |
| 35.                          | NA               | NA            | NA        | 100%               | 100%            |
| 36.                          | NA               | NA            | NA        | 100%               | 100%            |
| 37.                          | 100%             | 100%          | 100%      | 100%               | 100%            |
| 38.                          | 100%             | 100%          | 100%      | 100%               | 100%            |



|     |      |      |      |      |      |
|-----|------|------|------|------|------|
| 39. | 100% | 100% | 100% | 100% | 100% |
| 40. | NA   | NA   | NA   | 100% | 100% |
| 41. | NA   | NA   | NA   | 100% | 100% |
| 42. | NA   | NA   | NA   | 100% | 100% |
| 43. | NA   | NA   | NA   | 100% | 100% |
| 44. | 100% | 100% | 100% | NA   | 100% |
| 45. | 100% | 100% | 100% | NA   | 100% |
| 46. | NA   | NA   | NA   | 100% | 100% |
| 47. | 100% | 100% | 100% | NA   | 100% |
| 48. | 100% | 100% | 100% | 100% | 100% |
| 49. | 100% | 100% | 100% | 100% | 100% |
| 50. | 100% | 100% | 100% | 100% | 100% |
| 51. | 100% | 100% | 100% | 100% | 100% |
| 52. | 100% | 100% | 100% | 100% | 100% |
| 53. | 100% | 100% | 100% | 100% | 100% |
| 54. | 100% | 100% | 100% | 100% | 100% |
| 55. | NA   | NA   | NA   | 100% | 100% |
| 56. | 100% | 100% | 100% | NA   | 100% |
| 57. | NA   | NA   | NA   | 100% | 100% |
| 58. | 100% | 100% | 100% | NA   | 100% |
| 59. | 100% | 100% | 100% | NA   | 100% |
| 60. | 100% | 100% | 100% | NA   | 100% |
| 61. | NA   | NA   | NA   | 100% | 100% |
| 62. | NA   | NA   | NA   | 100% | 100% |
| 63. | NA   | NA   | NA   | 100% | 100% |
| 64. | NA   | NA   | NA   | 100% | 100% |
| 65. | NA   | NA   | NA   | 100% | 100% |
| 66. | NA   | NA   | NA   | 100% | 100% |
| 67. | NA   | NA   | NA   | 100% | 100% |
| 68. | NA   | NA   | NA   | 100% | 100% |
| 69. | NA   | NA   | NA   | 100% | 100% |
| 70. | NA   | NA   | NA   | 100% | 100% |
| 71. | NA   | NA   | NA   | 100% | 100% |
| 72. | NA   | NA   | NA   | 100% | 100% |
| 73. | NA   | NA   | NA   | 100% | 100% |
| 74. | 100% | 100% | 100% | NA   | 100% |

64 **Table S16.** Precision, recall, specificity, and F1 scores of each figure with image cropping:  
65 identifying additional substrate-specific information using GPT-4V. ‘Not applicable (NA)’ is  
66 indicated when there are no instances in the figure or when there is a division by zero error.

| <b>With image cropping</b> |                  |               |           |                    |                 |
|----------------------------|------------------|---------------|-----------|--------------------|-----------------|
| <b>Figure</b>              | <b>Precision</b> | <b>Recall</b> | <b>F1</b> | <b>Specificity</b> | <b>Accuracy</b> |
| 1.                         | NA               | NA            | NA        | 100%               | 100%            |
| 2.                         | NA               | NA            | NA        | 100%               | 100%            |
| 3.                         | 100%             | 100%          | 100%      | NA                 | 100%            |
| 4.                         | 100%             | 100%          | 100%      | NA                 | 100%            |
| 5.                         | 100%             | 100%          | 100%      | NA                 | 100%            |
| 6.                         | 100%             | 100%          | 100%      | NA                 | 100%            |
| 7.                         | 100%             | 100%          | 100%      | NA                 | 100%            |
| 8.                         | 100%             | 100%          | 100%      | NA                 | 100%            |
| 9.                         | 100%             | 100%          | 100%      | NA                 | 100%            |
| 10.                        | NA               | NA            | NA        | 100%               | 100%            |
| 11.                        | 100%             | 100%          | 100%      | NA                 | 100%            |
| 12.                        | 100%             | 100%          | 100%      | NA                 | 100%            |
| 13.                        | 100%             | 92%           | 96%       | NA                 | 92%             |
| 14.                        | 100%             | 100%          | 100%      | NA                 | 100%            |
| 15.                        | 100%             | 100%          | 100%      | NA                 | 100%            |
| 16.                        | 100%             | 100%          | 100%      | 100%               | 100%            |
| 17.                        | 75%              | 100%          | 86%       | 95%                | 96%             |
| 18.                        | 100%             | 100%          | 100%      | 100%               | 100%            |
| 19.                        | 0%               | NA            | NA        | 95%                | 95%             |
| 20.                        | NA               | NA            | NA        | 100%               | 100%            |
| 21.                        | NA               | NA            | NA        | 100%               | 100%            |
| 22.                        | NA               | NA            | NA        | 100%               | 100%            |
| 23.                        | NA               | NA            | NA        | 100%               | 100%            |
| 24.                        | 100%             | 100%          | 100%      | 100%               | 100%            |
| 25.                        | NA               | NA            | NA        | 100%               | 100%            |
| 26.                        | NA               | NA            | NA        | 100%               | 100%            |
| 27.                        | 100%             | 100%          | 100%      | 100%               | 100%            |
| 28.                        | 100%             | 100%          | 100%      | 100%               | 100%            |
| 29.                        | NA               | NA            | NA        | 100%               | 100%            |
| 30.                        | 0%               | NA            | NA        | 83%                | 83%             |
| 31.                        | 100%             | 100%          | 100%      | 100%               | 100%            |
| 32.                        | NA               | NA            | NA        | 100%               | 100%            |
| 33.                        | NA               | NA            | NA        | 100%               | 100%            |
| 34.                        | 100%             | 100%          | 100%      | 100%               | 100%            |
| 35.                        | NA               | NA            | NA        | 100%               | 100%            |
| 36.                        | NA               | NA            | NA        | 100%               | 100%            |
| 37.                        | 100%             | 25%           | 40%       | 100%               | 92%             |
| 38.                        | 100%             | 100%          | 100%      | 100%               | 100%            |

|     |      |      |      |      |      |
|-----|------|------|------|------|------|
| 39. | 100% | 100% | 100% | 100% | 100% |
| 40. | NA   | NA   | NA   | 100% | 100% |
| 41. | NA   | NA   | NA   | 100% | 100% |
| 42. | NA   | NA   | NA   | 100% | 100% |
| 43. | NA   | NA   | NA   | 100% | 100% |
| 44. | 100% | 94%  | 97%  | NA   | 94%  |
| 45. | 100% | 100% | 100% | NA   | 100% |
| 46. | NA   | NA   | NA   | 100% | 100% |
| 47. | 100% | 100% | 100% | NA   | 100% |
| 48. | 100% | 100% | 100% | 100% | 100% |
| 49. | 67%  | 100% | 80%  | 97%  | 97%  |
| 50. | 100% | 100% | 100% | 100% | 100% |
| 51. | 100% | 100% | 100% | 100% | 100% |
| 52. | 100% | 100% | 100% | 100% | 100% |
| 53. | 100% | 100% | 100% | 100% | 100% |
| 54. | 100% | 100% | 100% | 100% | 100% |
| 55. | NA   | NA   | NA   | 100% | 100% |
| 56. | 100% | 100% | 100% | NA   | 100% |
| 57. | NA   | NA   | NA   | 100% | 100% |
| 58. | 100% | 100% | 100% | NA   | 100% |
| 59. | 100% | 100% | 100% | NA   | 100% |
| 60. | 100% | 100% | 100% | NA   | 100% |
| 61. | NA   | NA   | NA   | 100% | 100% |
| 62. | NA   | NA   | NA   | 100% | 100% |
| 63. | NA   | NA   | NA   | 100% | 100% |
| 64. | NA   | NA   | NA   | 100% | 100% |
| 65. | NA   | NA   | NA   | 100% | 100% |
| 66. | NA   | NA   | NA   | 100% | 100% |
| 67. | NA   | NA   | NA   | 100% | 100% |
| 68. | NA   | NA   | NA   | 100% | 100% |
| 69. | NA   | NA   | NA   | 100% | 100% |
| 70. | NA   | NA   | NA   | 100% | 100% |
| 71. | NA   | NA   | NA   | 100% | 100% |
| 72. | NA   | NA   | NA   | 100% | 100% |
| 73. | NA   | NA   | NA   | 100% | 100% |
| 74. | 100% | 100% | 100% | NA   | 100% |

68 **Table S17.** Recall scores of each figure with image cropping: identifying index-yield pairs  
 69 using Gemini. ‘Not applicable (NA)’ is indicated when there are no instances in the figure or  
 70 when there is a division by zero error.

| <b>Figure</b> | <b>Recall</b> | <b>Figure</b> | <b>Recall</b> |
|---------------|---------------|---------------|---------------|
| 1.            | 92%           | 38.           | 100%          |
| 2.            | 100%          | 39.           | 100%          |
| 3.            | 100%          | 40.           | 100%          |
| 4.            | 100%          | 41.           | 100%          |
| 5.            | 100%          | 42.           | 100%          |
| 6.            | 100%          | 43.           | 100%          |
| 7.            | 100%          | 44.           | 100%          |
| 8.            | 100%          | 45.           | 100%          |
| 9.            | 100%          | 46.           | 100%          |
| 10.           | 100%          | 47.           | 100%          |
| 11.           | 100%          | 48.           | 100%          |
| 12.           | 100%          | 49.           | 100%          |
| 13.           | 100%          | 50.           | 100%          |
| 14.           | 100%          | 51.           | 100%          |
| 15.           | 100%          | 52.           | 100%          |
| 16.           | 100%          | 53.           | 100%          |
| 17.           | 100%          | 54.           | 100%          |
| 18.           | 100%          | 55.           | 100%          |
| 19.           | 100%          | 56.           | 100%          |
| 20.           | 100%          | 57.           | 100%          |
| 21.           | 100%          | 58.           | 100%          |
| 22.           | 100%          | 59.           | 100%          |
| 23.           | 100%          | 60.           | 100%          |
| 24.           | 100%          | 61.           | 100%          |
| 25.           | 75%           | 62.           | 100%          |
| 26.           | 100%          | 63.           | 100%          |
| 27.           | 100%          | 64.           | 100%          |
| 28.           | 100%          | 65.           | 100%          |
| 29.           | 100%          | 66.           | 100%          |
| 30.           | 100%          | 67.           | 100%          |
| 31.           | 100%          | 68.           | 100%          |
| 32.           | 100%          | 69.           | 100%          |
| 33.           | 100%          | 70.           | 100%          |
| 34.           | 100%          | 71.           | 100%          |
| 35.           | 100%          | 72.           | 100%          |
| 36.           | 100%          | 73.           | 100%          |
| 37.           | 97%           | 74.           | 100%          |

71 **Table S18.** Precision, recall, F1 scores, specificity, and accuracy of each figure with image  
72 cropping: identifying additional substrate-specific information using Gemini. ‘Not applicable  
73 (NA)’ is indicated when there are no instances in the figure or when there is a division by zero  
74 error.

| <b>Figure</b> | <b>Precision</b> | <b>Recall</b> | <b>F1</b> | <b>Specificity</b> | <b>Accuracy</b> |
|---------------|------------------|---------------|-----------|--------------------|-----------------|
| 1.            | NA               | NA            | NA        | 100%               | 100%            |
| 2.            | NA               | NA            | NA        | 100%               | 100%            |
| 3.            | 100%             | 100%          | 100%      | NA                 | 100%            |
| 4.            | 100%             | 100%          | 100%      | NA                 | 100%            |
| 5.            | 100%             | 100%          | 100%      | NA                 | 100%            |
| 6.            | 100%             | 100%          | 100%      | NA                 | 100%            |
| 7.            | 100%             | 100%          | 100%      | NA                 | 100%            |
| 8.            | 100%             | 52%           | 68%       | NA                 | 52%             |
| 9.            | 100%             | 100%          | 100%      | NA                 | 100%            |
| 10.           | NA               | NA            | NA        | 100%               | 100%            |
| 11.           | 100%             | 100%          | 100%      | NA                 | 100%            |
| 12.           | 100%             | 100%          | 100%      | NA                 | 100%            |
| 13.           | 100%             | 100%          | 100%      | NA                 | 100%            |
| 14.           | 100%             | 100%          | 100%      | NA                 | 100%            |
| 15.           | 100%             | 100%          | 100%      | NA                 | 100%            |
| 16.           | 100%             | 50%           | 67%       | 100%               | 97%             |
| 17.           | 100%             | 100%          | 100%      | 100%               | 100%            |
| 18.           | 100%             | 100%          | 100%      | 100%               | 100%            |
| 19.           | NA               | NA            | NA        | 100%               | 100%            |
| 20.           | NA               | NA            | NA        | 100%               | 100%            |
| 21.           | NA               | NA            | NA        | 100%               | 100%            |
| 22.           | NA               | NA            | NA        | 100%               | 100%            |
| 23.           | NA               | NA            | NA        | 100%               | 100%            |
| 24.           | 100%             | 100%          | 100%      | 100%               | 100%            |
| 25.           | NA               | NA            | NA        | 100%               | 100%            |
| 26.           | NA               | NA            | NA        | 100%               | 100%            |
| 27.           | 100%             | 100%          | 100%      | 100%               | 100%            |
| 28.           | 100%             | 100%          | 100%      | 100%               | 100%            |
| 29.           | NA               | NA            | NA        | 100%               | 100%            |
| 30.           | NA               | NA            | NA        | 100%               | 100%            |
| 31.           | 100%             | 100%          | 100%      | 100%               | 100%            |
| 32.           | NA               | NA            | NA        | 100%               | 100%            |
| 33.           | NA               | NA            | NA        | 100%               | 100%            |
| 34.           | NA               | NA            | NA        | 100%               | 100%            |
| 35.           | NA               | NA            | NA        | 100%               | 100%            |
| 36.           | NA               | NA            | NA        | 100%               | 100%            |
| 37.           | 100%             | 100%          | 100%      | 100%               | 100%            |

|     |      |      |      |      |      |
|-----|------|------|------|------|------|
| 38. | 100% | 100% | 100% | 100% | 100% |
| 39. | 100% | 100% | 100% | 100% | 100% |
| 40. | NA   | NA   | NA   | 100% | 100% |
| 41. | NA   | NA   | NA   | 100% | 100% |
| 42. | NA   | NA   | NA   | 100% | 100% |
| 43. | NA   | NA   | NA   | 100% | 100% |
| 44. | 100% | 100% | 100% | NA   | 100% |
| 45. | 100% | 100% | 100% | NA   | 100% |
| 46. | NA   | NA   | NA   | 100% | 100% |
| 47. | 100% | 100% | 100% | NA   | 100% |
| 48. | 100% | 100% | 100% | 100% | 100% |
| 49. | 100% | 100% | 100% | 100% | 100% |
| 50. | 100% | 100% | 100% | 100% | 100% |
| 51. | 100% | 100% | 100% | 100% | 100% |
| 52. | 100% | 100% | 100% | 100% | 100% |
| 53. | 100% | 100% | 100% | 100% | 100% |
| 54. | 100% | 100% | 100% | 100% | 100% |
| 55. | NA   | NA   | NA   | 100% | 100% |
| 56. | 100% | 100% | 100% | NA   | 100% |
| 57. | NA   | NA   | NA   | 100% | 100% |
| 58. | 100% | 100% | 100% | NA   | 100% |
| 59. | 100% | 100% | 100% | NA   | 100% |
| 60. | 100% | 100% | 100% | NA   | 100% |
| 61. | NA   | NA   | NA   | 100% | 100% |
| 62. | NA   | NA   | NA   | 100% | 100% |
| 63. | NA   | NA   | NA   | 100% | 100% |
| 64. | NA   | NA   | NA   | 100% | 100% |
| 65. | NA   | NA   | NA   | 100% | 100% |
| 66. | NA   | NA   | NA   | 100% | 100% |
| 67. | NA   | NA   | NA   | 100% | 100% |
| 68. | NA   | NA   | NA   | 100% | 100% |
| 69. | NA   | NA   | NA   | 100% | 100% |
| 70. | NA   | NA   | NA   | 100% | 100% |
| 71. | NA   | NA   | NA   | 100% | 100% |
| 72. | NA   | NA   | NA   | 100% | 100% |
| 73. | NA   | NA   | NA   | 100% | 100% |
| 74. | 100% | 33%  | 50%  | NA   | 33%  |

76 **Table S19.** Recall scores of each figure with image cropping: identifying index-yield pairs  
 77 using Claude 3. ‘Not applicable (NA)’ is indicated when there are no instances in the figure or  
 78 when there is a division by zero error.

| <b>Figure</b> | <b>Recall</b> | <b>Figure</b> | <b>Recall</b> |
|---------------|---------------|---------------|---------------|
| 1.            | 100%          | 38.           | 100%          |
| 2.            | 100%          | 39.           | 100%          |
| 3.            | 100%          | 40.           | 100%          |
| 4.            | 100%          | 41.           | 100%          |
| 5.            | 100%          | 42.           | 100%          |
| 6.            | 100%          | 43.           | 100%          |
| 7.            | 100%          | 44.           | 83%           |
| 8.            | 100%          | 45.           | 100%          |
| 9.            | 100%          | 46.           | 67%           |
| 10.           | 100%          | 47.           | 100%          |
| 11.           | 100%          | 48.           | 100%          |
| 12.           | 100%          | 49.           | 100%          |
| 13.           | 100%          | 50.           | 100%          |
| 14.           | 100%          | 51.           | 100%          |
| 15.           | 100%          | 52.           | 87%           |
| 16.           | 100%          | 53.           | 100%          |
| 17.           | 100%          | 54.           | 100%          |
| 18.           | 100%          | 55.           | 100%          |
| 19.           | 100%          | 56.           | 100%          |
| 20.           | 100%          | 57.           | 100%          |
| 21.           | 100%          | 58.           | 93%           |
| 22.           | 100%          | 59.           | 100%          |
| 23.           | 100%          | 60.           | 100%          |
| 24.           | 100%          | 61.           | 95%           |
| 25.           | 92%           | 62.           | 100%          |
| 26.           | 100%          | 63.           | 100%          |
| 27.           | 100%          | 64.           | 100%          |
| 28.           | 95%           | 65.           | 100%          |
| 29.           | 100%          | 66.           | 100%          |
| 30.           | 100%          | 67.           | 100%          |
| 31.           | 100%          | 68.           | 100%          |
| 32.           | 100%          | 69.           | 75%           |
| 33.           | 97%           | 70.           | 100%          |
| 34.           | 100%          | 71.           | 100%          |
| 35.           | 100%          | 72.           | 100%          |
| 36.           | 100%          | 73.           | 100%          |
| 37.           | 100%          | 74.           | 100%          |

79 **Table S20.** Precision, recall, F1 scores, specificity, and accuracy of each figure with image  
80 cropping: identifying additional substrate-specific information using Claude 3. ‘Not applicable  
81 (NA)’ is indicated when there are no instances in the figure or when there is a division by zero  
82 error.

| <b>Figure</b> | <b>Precision</b> | <b>Recall</b> | <b>F1</b> | <b>Specificity</b> | <b>Accuracy</b> |
|---------------|------------------|---------------|-----------|--------------------|-----------------|
| 1.            | NA               | NA            | NA        | 100%               | 100%            |
| 2.            | NA               | NA            | NA        | 100%               | 100%            |
| 3.            | 100%             | 100%          | 100%      | NA                 | 100%            |
| 4.            | 100%             | 100%          | 100%      | NA                 | 100%            |
| 5.            | 100%             | 100%          | 100%      | NA                 | 100%            |
| 6.            | 100%             | 100%          | 100%      | NA                 | 100%            |
| 7.            | 100%             | 100%          | 100%      | NA                 | 100%            |
| 8.            | 100%             | 100%          | 100%      | NA                 | 100%            |
| 9.            | 100%             | 100%          | 100%      | NA                 | 100%            |
| 10.           | NA               | NA            | NA        | 100%               | 100%            |
| 11.           | 100%             | 100%          | 100%      | NA                 | 100%            |
| 12.           | 100%             | 100%          | 100%      | NA                 | 100%            |
| 13.           | 100%             | 100%          | 100%      | NA                 | 100%            |
| 14.           | 100%             | 100%          | 100%      | NA                 | 100%            |
| 15.           | 100%             | 100%          | 100%      | NA                 | 100%            |
| 16.           | 100%             | 100%          | 100%      | 100%               | 100%            |
| 17.           | 100%             | 100%          | 100%      | 100%               | 100%            |
| 18.           | 100%             | 100%          | 100%      | 100%               | 100%            |
| 19.           | NA               | NA            | NA        | 100%               | 100%            |
| 20.           | NA               | NA            | NA        | 100%               | 100%            |
| 21.           | NA               | NA            | NA        | 100%               | 100%            |
| 22.           | NA               | NA            | NA        | 100%               | 100%            |
| 23.           | NA               | NA            | NA        | 100%               | 100%            |
| 24.           | 100%             | 100%          | 100%      | 100%               | 100%            |
| 25.           | NA               | NA            | NA        | 100%               | 100%            |
| 26.           | NA               | NA            | NA        | 100%               | 100%            |
| 27.           | 100%             | 100%          | 100%      | 100%               | 100%            |
| 28.           | 100%             | 100%          | 100%      | 100%               | 100%            |
| 29.           | NA               | NA            | NA        | 100%               | 100%            |
| 30.           | NA               | NA            | NA        | 100%               | 100%            |
| 31.           | 100%             | 100%          | 100%      | 100%               | 100%            |
| 32.           | NA               | NA            | NA        | 100%               | 100%            |
| 33.           | NA               | NA            | NA        | 100%               | 100%            |
| 34.           | NA               | NA            | NA        | 100%               | 100%            |
| 35.           | NA               | NA            | NA        | 100%               | 100%            |
| 36.           | NA               | NA            | NA        | 100%               | 100%            |
| 37.           | 100%             | 100%          | 100%      | 100%               | 100%            |



|     |      |      |      |      |      |
|-----|------|------|------|------|------|
| 38. | 100% | 100% | 100% | 100% | 100% |
| 39. | 100% | 100% | 100% | 100% | 100% |
| 40. | NA   | NA   | NA   | 100% | 100% |
| 41. | NA   | NA   | NA   | 100% | 100% |
| 42. | NA   | NA   | NA   | 100% | 100% |
| 43. | NA   | NA   | NA   | 100% | 100% |
| 44. | 100% | 100% | 100% | NA   | 100% |
| 45. | 100% | 100% | 100% | NA   | 100% |
| 46. | 0%   | NA   | NA   | 67%  | 67%  |
| 47. | 100% | 100% | 100% | NA   | 100% |
| 48. | 100% | 100% | 100% | 100% | 100% |
| 49. | 100% | 100% | 100% | 100% | 100% |
| 50. | 100% | 100% | 100% | 100% | 100% |
| 51. | 100% | 100% | 100% | 100% | 100% |
| 52. | 100% | 100% | 100% | 100% | 100% |
| 53. | 100% | 100% | 100% | 100% | 100% |
| 54. | 100% | 100% | 100% | 100% | 100% |
| 55. | NA   | NA   | NA   | 100% | 100% |
| 56. | 100% | 100% | 100% | NA   | 100% |
| 57. | NA   | NA   | NA   | 100% | 100% |
| 58. | 100% | 93%  | 96%  | NA   | 93%  |
| 59. | 100% | 100% | 100% | NA   | 100% |
| 60. | 100% | 100% | 100% | NA   | 100% |
| 61. | NA   | NA   | NA   | 100% | 100% |
| 62. | NA   | NA   | NA   | 100% | 100% |
| 63. | NA   | NA   | NA   | 100% | 100% |
| 64. | NA   | NA   | NA   | 100% | 100% |
| 65. | NA   | NA   | NA   | 100% | 100% |
| 66. | NA   | NA   | NA   | 100% | 100% |
| 67. | NA   | NA   | NA   | 100% | 100% |
| 68. | NA   | NA   | NA   | 100% | 100% |
| 69. | NA   | NA   | NA   | 100% | 100% |
| 70. | NA   | NA   | NA   | 100% | 100% |
| 71. | NA   | NA   | NA   | 100% | 100% |
| 72. | NA   | NA   | NA   | 100% | 100% |
| 73. | NA   | NA   | NA   | 100% | 100% |
| 74. | 100% | 100% | 100% | NA   | 100% |

84 **Table S21.** Recall scores of each figure with image cropping: identifying index-yield pairs  
 85 using LLaVA. ‘Not applicable (NA)’ is indicated when there are no instances in the figure or  
 86 when there is a division by zero error.

| <b>Figure</b> | <b>Recall</b> | <b>Figure</b> | <b>Recall</b> |
|---------------|---------------|---------------|---------------|
| 1.            | 77%           | 38.           | 82%           |
| 2.            | 29%           | 39.           | 88%           |
| 3.            | 71%           | 40.           | 100%          |
| 4.            | 94%           | 41.           | 33%           |
| 5.            | 100%          | 42.           | 85%           |
| 6.            | 100%          | 43.           | 54%           |
| 7.            | 43%           | 44.           | 39%           |
| 8.            | 68%           | 45.           | 88%           |
| 9.            | 75%           | 46.           | 0%            |
| 10.           | 81%           | 47.           | 54%           |
| 11.           | 69%           | 48.           | 89%           |
| 12.           | 42%           | 49.           | 0%            |
| 13.           | 8%            | 50.           | 88%           |
| 14.           | 88%           | 51.           | 100%          |
| 15.           | 93%           | 52.           | 0%            |
| 16.           | 71%           | 53.           | 83%           |
| 17.           | 88%           | 54.           | 76%           |
| 18.           | 94%           | 55.           | 73%           |
| 19.           | 41%           | 56.           | 89%           |
| 20.           | 100%          | 57.           | 76%           |
| 21.           | 83%           | 58.           | 29%           |
| 22.           | 88%           | 59.           | 92%           |
| 23.           | 100%          | 60.           | 33%           |
| 24.           | 60%           | 61.           | 13%           |
| 25.           | 25%           | 62.           | 93%           |
| 26.           | 90%           | 63.           | 43%           |
| 27.           | 67%           | 64.           | 97%           |
| 28.           | 75%           | 65.           | 100%          |
| 29.           | 88%           | 66.           | 86%           |
| 30.           | 100%          | 67.           | 100%          |
| 31.           | 73%           | 68.           | 79%           |
| 32.           | 65%           | 69.           | 100%          |
| 33.           | 66%           | 70.           | 100%          |
| 34.           | 94%           | 71.           | 81%           |
| 35.           | 93%           | 72.           | 100%          |
| 36.           | 56%           | 73.           | 0%            |
| 37.           | 79%           | 74.           | 76%           |

87 **Table S22.** Precision, recall, F1 scores, specificity, and accuracy of each figure with image  
88 cropping: identifying additional substrate-specific information using LLaVA. ‘Not applicable  
89 (NA)’ is indicated when there are no instances in the figure or when there is a division by zero  
90 error.

| <b>Figure</b> | <b>Precision</b> | <b>Recall</b> | <b>F1</b> | <b>Specificity</b> | <b>Accuracy</b> |
|---------------|------------------|---------------|-----------|--------------------|-----------------|
| 1.            | 0%               | NA            | NA        | 77%                | 77%             |
| 2.            | 0%               | NA            | NA        | 29%                | 29%             |
| 3.            | NA               | 0%            | NA        | NA                 | 0%              |
| 4.            | 100%             | 94%           | 97%       | NA                 | 94%             |
| 5.            | 100%             | 100%          | 100%      | NA                 | 100%            |
| 6.            | 100%             | 100%          | 100%      | NA                 | 100%            |
| 7.            | 100%             | 27%           | 42%       | NA                 | 27%             |
| 8.            | 100%             | 68%           | 81%       | NA                 | 68%             |
| 9.            | 100%             | 36%           | 53%       | NA                 | 36%             |
| 10.           | NA               | NA            | NA        | 100%               | 100%            |
| 11.           | 100%             | 66%           | 79%       | NA                 | 66%             |
| 12.           | 100%             | 42%           | 59%       | NA                 | 42%             |
| 13.           | 100%             | 85%           | 92%       | NA                 | 85%             |
| 14.           | 100%             | 100%          | 100%      | NA                 | 100%            |
| 15.           | 100%             | 70%           | 82%       | NA                 | 70%             |
| 16.           | NA               | 0%            | NA        | 100%               | 95%             |
| 17.           | 15%              | 67%           | 25%       | 48%                | 50%             |
| 18.           | NA               | 0%            | NA        | 100%               | 88%             |
| 19.           | 0%               | NA            | NA        | 86%                | 86%             |
| 20.           | NA               | NA            | NA        | 100%               | 100%            |
| 21.           | NA               | NA            | NA        | 100%               | 100%            |
| 22.           | NA               | NA            | NA        | 100%               | 100%            |
| 23.           | NA               | NA            | NA        | 100%               | 100%            |
| 24.           | 67%              | 100%          | 80%       | 43%                | 73%             |
| 25.           | 0%               | NA            | NA        | 25%                | 25%             |
| 26.           | NA               | NA            | NA        | 100%               | 100%            |
| 27.           | NA               | 0%            | NA        | 100%               | 22%             |
| 28.           | NA               | 0%            | NA        | 100%               | 60%             |
| 29.           | NA               | NA            | NA        | 100%               | 100%            |
| 30.           | NA               | NA            | NA        | 100%               | 100%            |
| 31.           | 100%             | 100%          | 100%      | 100%               | 100%            |
| 32.           | 0%               | NA            | NA        | 94%                | 94%             |
| 33.           | 0%               | NA            | NA        | 69%                | 69%             |
| 34.           | NA               | NA            | NA        | 100%               | 100%            |
| 35.           | 0%               | NA            | NA        | 93%                | 93%             |
| 36.           | NA               | NA            | NA        | 100%               | 100%            |
| 37.           | 0%               | 0%            | NA        | 89%                | 79%             |

|     |      |      |      |      |      |
|-----|------|------|------|------|------|
| 38. | 100% | 88%  | 93%  | 100% | 91%  |
| 39. | 100% | 100% | 100% | 100% | 100% |
| 40. | NA   | NA   | NA   | 100% | 100% |
| 41. | 0%   | NA   | NA   | 33%  | 33%  |
| 42. | 0%   | NA   | NA   | 85%  | 85%  |
| 43. | 0%   | NA   | NA   | 38%  | 38%  |
| 44. | NA   | 0%   | NA   | NA   | 0%   |
| 45. | 100% | 100% | 100% | NA   | 100% |
| 46. | 0%   | NA   | NA   | 76%  | 76%  |
| 47. | NA   | 0%   | NA   | NA   | 0%   |
| 48. | 50%  | 100% | 67%  | 94%  | 94%  |
| 49. | 0%   | 0%   | NA   | 0%   | 0%   |
| 50. | 60%  | 100% | 75%  | 85%  | 88%  |
| 51. | 100% | 100% | 100% | 100% | 100% |
| 52. | 0%   | 0%   | NA   | 0%   | 0%   |
| 53. | 100% | 40%  | 57%  | 100% | 88%  |
| 54. | 0%   | 0%   | NA   | 80%  | 76%  |
| 55. | 0%   | NA   | NA   | 73%  | 73%  |
| 56. | 100% | 100% | 100% | NA   | 100% |
| 57. | 0%   | NA   | NA   | 76%  | 76%  |
| 58. | 100% | 29%  | 44%  | NA   | 29%  |
| 59. | 100% | 92%  | 96%  | NA   | 92%  |
| 60. | 100% | 29%  | 44%  | NA   | 29%  |
| 61. | 0%   | NA   | NA   | 13%  | 13%  |
| 62. | 0%   | NA   | NA   | 93%  | 93%  |
| 63. | 0%   | NA   | NA   | 79%  | 79%  |
| 64. | 0%   | NA   | NA   | 97%  | 97%  |
| 65. | NA   | NA   | NA   | 100% | 100% |
| 66. | 0%   | NA   | NA   | 95%  | 95%  |
| 67. | NA   | NA   | NA   | 100% | 100% |
| 68. | 0%   | NA   | NA   | 79%  | 79%  |
| 69. | NA   | NA   | NA   | 100% | 100% |
| 70. | NA   | NA   | NA   | 100% | 100% |
| 71. | 0%   | NA   | NA   | 81%  | 81%  |
| 72. | NA   | NA   | NA   | 100% | 100% |
| 73. | 0%   | NA   | NA   | 0%   | 0%   |
| 74. | 100% | 76%  | 86%  | NA   | 76%  |

92 **Table S23.** Recall scores of each figure with image cropping: identifying index-yield pairs  
 93 using InternVL. ‘Not applicable (NA)’ is indicated when there are no instances in the figure or  
 94 when there is a division by zero error.

| <b>Figure</b> | <b>Recall</b> | <b>Figure</b> | <b>Recall</b> |
|---------------|---------------|---------------|---------------|
| 1.            | 77%           | 38.           | 82%           |
| 2.            | 0%            | 39.           | 0%            |
| 3.            | 52%           | 40.           | 100%          |
| 4.            | 63%           | 41.           | 100%          |
| 5.            | 100%          | 42.           | 73%           |
| 6.            | 100%          | 43.           | 17%           |
| 7.            | 13%           | 44.           | 22%           |
| 8.            | 6%            | 45.           | 100%          |
| 9.            | 0%            | 46.           | 24%           |
| 10.           | 13%           | 47.           | 75%           |
| 11.           | 57%           | 48.           | 39%           |
| 12.           | 17%           | 49.           | 3%            |
| 13.           | 69%           | 50.           | 45%           |
| 14.           | 100%          | 51.           | 67%           |
| 15.           | 7%            | 52.           | 80%           |
| 16.           | 79%           | 53.           | 25%           |
| 17.           | 0%            | 54.           | 81%           |
| 18.           | 41%           | 55.           | 52%           |
| 19.           | 27%           | 56.           | 22%           |
| 20.           | 93%           | 57.           | 38%           |
| 21.           | 100%          | 58.           | 0%            |
| 22.           | 48%           | 59.           | 77%           |
| 23.           | 20%           | 60.           | 19%           |
| 24.           | 33%           | 61.           | 0%            |
| 25.           | 46%           | 62.           | 25%           |
| 26.           | 95%           | 63.           | 64%           |
| 27.           | 61%           | 64.           | 76%           |
| 28.           | 60%           | 65.           | 83%           |
| 29.           | 63%           | 66.           | 0%            |
| 30.           | 50%           | 67.           | 88%           |
| 31.           | 45%           | 68.           | 86%           |
| 32.           | 29%           | 69.           | 63%           |
| 33.           | 54%           | 70.           | 88%           |
| 34.           | 94%           | 71.           | 88%           |
| 35.           | 54%           | 72.           | 68%           |
| 36.           | 44%           | 73.           | 88%           |
| 37.           | 0%            | 74.           | 0%            |

95 **Table S24.** Precision, recall, F1 scores, specificity, and accuracy of each figure with image  
 96 cropping: identifying additional substrate-specific information using InternVL. ‘Not applicable  
 97 (NA)’ is indicated when there are no instances in the figure or when there is a division by zero  
 98 error.

| Figure | Precision | Recall | F1   | Specificity | Accuracy |
|--------|-----------|--------|------|-------------|----------|
| 1.     | 0%        | NA     | NA   | 85%         | 85%      |
| 2.     | 0%        | NA     | NA   | 86%         | 86%      |
| 3.     | 100%      | 32%    | 49%  | NA          | 32%      |
| 4.     | 100%      | 63%    | 77%  | NA          | 63%      |
| 5.     | 100%      | 86%    | 92%  | NA          | 86%      |
| 6.     | 100%      | 100%   | 100% | NA          | 100%     |
| 7.     | 100%      | 13%    | 24%  | NA          | 13%      |
| 8.     | 100%      | 6%     | 12%  | NA          | 6%       |
| 9.     | NA        | 0%     | NA   | NA          | 0%       |
| 10.    | 0%        | NA     | NA   | 0%          | 0%       |
| 11.    | 100%      | 54%    | 70%  | NA          | 54%      |
| 12.    | 100%      | 17%    | 29%  | NA          | 17%      |
| 13.    | 100%      | 69%    | 82%  | NA          | 69%      |
| 14.    | 100%      | 88%    | 93%  | NA          | 88%      |
| 15.    | NA        | 0%     | NA   | NA          | 0%       |
| 16.    | NA        | 0%     | NA   | 100%        | 95%      |
| 17.    | 0%        | 0%     | NA   | 0%          | 0%       |
| 18.    | 0%        | 0%     | NA   | 33%         | 29%      |
| 19.    | 0%        | NA     | NA   | 0%          | 0%       |
| 20.    | 0%        | NA     | NA   | 93%         | 93%      |
| 21.    | NA        | NA     | NA   | 100%        | 100%     |
| 22.    | 0%        | NA     | NA   | 48%         | 48%      |
| 23.    | 0%        | NA     | NA   | 20%         | 20%      |
| 24.    | 25%       | 14%    | 18%  | 63%         | 40%      |
| 25.    | 0%        | NA     | NA   | 75%         | 75%      |
| 26.    | 0%        | NA     | NA   | 95%         | 95%      |
| 27.    | 50%       | 29%    | 36%  | 0%          | 22%      |
| 28.    | 100%      | 50%    | 67%  | 100%        | 80%      |
| 29.    | 0%        | NA     | NA   | 63%         | 63%      |
| 30.    | 0%        | NA     | NA   | 0%          | 0%       |
| 31.    | 0%        | 0%     | NA   | 48%         | 45%      |
| 32.    | 0%        | NA     | NA   | 12%         | 12%      |
| 33.    | 0%        | NA     | NA   | 54%         | 54%      |
| 34.    | 0%        | NA     | NA   | 94%         | 94%      |
| 35.    | 0%        | NA     | NA   | 0%          | 0%       |
| 36.    | 0%        | NA     | NA   | 44%         | 44%      |
| 37.    | 0%        | 0%     | NA   | 0%          | 0%       |

|     |      |     |     |      |      |
|-----|------|-----|-----|------|------|
| 38. | 100% | 38% | 55% | 100% | 55%  |
| 39. | 0%   | 0%  | NA  | 0%   | 0%   |
| 40. | NA   | NA  | NA  | 100% | 100% |
| 41. | NA   | NA  | NA  | 100% | 100% |
| 42. | 0%   | NA  | NA  | 73%  | 73%  |
| 43. | 0%   | NA  | NA  | 0%   | 0%   |
| 44. | NA   | 0%  | NA  | NA   | 0%   |
| 45. | NA   | 0%  | NA  | NA   | 0%   |
| 46. | 0%   | NA  | NA  | 0%   | 0%   |
| 47. | 100% | 17% | 29% | NA   | 17%  |
| 48. | 0%   | 0%  | NA  | 0%   | 0%   |
| 49. | 0%   | 0%  | NA  | 3%   | 3%   |
| 50. | 5%   | 17% | 8%  | 33%  | 30%  |
| 51. | 83%  | 63% | 71% | 75%  | 67%  |
| 52. | 75%  | 43% | 55% | 88%  | 67%  |
| 53. | 0%   | 0%  | NA  | 21%  | 17%  |
| 54. | 0%   | 0%  | NA  | 75%  | 71%  |
| 55. | 0%   | NA  | NA  | 52%  | 52%  |
| 56. | 100% | 22% | 36% | NA   | 22%  |
| 57. | 0%   | NA  | NA  | 38%  | 38%  |
| 58. | NA   | 0%  | NA  | NA   | 0%   |
| 59. | NA   | 0%  | NA  | NA   | 0%   |
| 60. | 100% | 19% | 32% | NA   | 19%  |
| 61. | 0%   | NA  | NA  | 0%   | 0%   |
| 62. | 0%   | NA  | NA  | 25%  | 25%  |
| 63. | 0%   | NA  | NA  | 64%  | 64%  |
| 64. | 0%   | NA  | NA  | 76%  | 76%  |
| 65. | 0%   | NA  | NA  | 83%  | 83%  |
| 66. | 0%   | NA  | NA  | 0%   | 0%   |
| 67. | 0%   | NA  | NA  | 88%  | 88%  |
| 68. | 0%   | NA  | NA  | 86%  | 86%  |
| 69. | 0%   | NA  | NA  | 63%  | 63%  |
| 70. | NA   | NA  | NA  | 100% | 100% |
| 71. | NA   | NA  | NA  | 100% | 100% |
| 72. | 0%   | NA  | NA  | 68%  | 68%  |
| 73. | 0%   | NA  | NA  | 88%  | 88%  |
| 74. | NA   | 0%  | NA  | NA   | 0%   |

## 101 References

- 102 1 Y. Qiu, J. Struwe, T. H. Meyer, J. C. A. Oliveira, L. Ackermann, Catalyst- and Reagent-Free  
103 Electrochemical Azole C–H Amination, *Chem. Eur. J.* 2018, **24**, 12784.
- 104 2 E. Yu, H. Kim, C.-M. Park, Metal- and Oxidant-Free Electrosynthesis of Heterocycles from 1,2-  
105 Diarylalkene Derivatives, *Adv. Synth. Catal.* 2022, **364**, 4088.
- 106 3 Y.-F. Tang, D. Yang, Y.-N. Zhao, J.-F. Lv, Z. Guan, Y.-H. He, Electrochemical radical–polar crossover  
107 diesterification of alkenes with carboxylic acids, *Green Chem.*, 2023, **25**, 1540-1545.
- 108 4 OpenAI, et al. GPT-4 Technical Report. arXiv, 2023, DOI: 10.48550/arXiv.2303.08774.
- 109 5 Gemini Team et al., Gemini: A Family of Highly Capable Multimodal Models. arXiv, 2023, DOI:  
110 10.48550/arXiv.2312.11805.
- 111 6 Anthropic, The Claude 3 Model Family: Opus, Sonnet, Haiku, 2024, [https://www-](https://www-cdn.anthropic.com/de8ba9b01c9ab7cbabf5c33b80b7bbc618857627/Model_Card_Claude_3.pdf)  
112 [cdn.anthropic.com/de8ba9b01c9ab7cbabf5c33b80b7bbc618857627/Model\\_Card\\_Claude\\_3.pdf](https://www-cdn.anthropic.com/de8ba9b01c9ab7cbabf5c33b80b7bbc618857627/Model_Card_Claude_3.pdf).
- 113 7 Z. Chen, J. Wu, W. Wang, W. Su, G. Chen, S. Xing, M. Zhong, Q. Zhang, X. Zhu, L. Lu, B. Li, P.  
114 Luo, T. Lu, Y. Qiao and J. Dai, InternVL: Scaling up Vision Foundation Models and Aligning for  
115 Generic Visual-Linguistic Tasks. *arXiv*, 2024, DOI: 10.48550/arXiv.2312.14238.
- 116 8 H. Liu, C. Li, Q. Wu and Y. J. Lee, Visual Instruction Tuning. *arXiv*, 2023, DOI:  
117 10.48550/arXiv.2304.08485.
- 118 9 H. Liu, C. Li, Y. Li and Y. J. Lee, Improved Baselines with Visual Instruction Tuning. *arXiv*, 2023,  
119 DOI: 10.48550/arXiv.2310.03744.
- 120 10 A. Halder, S. Ghosh and S. De Sarkar, Transition Metal and Base-Free Electro-Oxidative  
121 Regioselective Trifluoromethylation of Imidazo[1,2-*a*]pyridines, *Asian J Org Chem*, 2023, **12**,  
122 e202300294.
- 123 11 Y.-F. Tan, D. Yang, Y.-H. Yang, J.-F. Lv, L.-X. Zong, Z. Guan and Y.-H. He, Electricity-driven 1,4-  
124 alkoxydimerization of alkenes *via* radical–polar crossover, *Green Chem.*, 2023, **25**, 9388–9393.
- 125 12 X. Zhou, L. Guo, H. Zhang, R. Y. Xia, C. Yang and W. Xia, Nickel-Catalyzed Reductive Acylation  
126 of Carboxylic Acids with Alkyl Halides and *N*-Hydroxyphthalimide Esters Enabled by  
127 Electrochemical Process, *Adv Synth Catal*, 2022, **364**, 1526–1531.
- 128 13 A. O. Terent'ev, O. M. Mulina, V. D. Parshin, V. A. Kokorekin and G. I. Nikishin, Electrochemically  
129 induced oxidative S–O coupling: synthesis of sulfonates from sulfonyl hydrazides and *N*-  
130 hydroxyimides or *N*-hydroxybenzotriazoles, *Org. Biomol. Chem.*, 2019, **17**, 3482–3488.
- 131 14 D. Wilary and J. M. Cole, ReactionDataExtractor 2.0: A Deep Learning Approach for Data  
132 Extraction from Chemical Reaction Schemes. *J. Chem. Inf. Model.* 2023, **63**, 6053–6067.
- 133 15 Y. Qian, J. Guo, Z. Tu, C. W. Coley and R. Barzilay, RxnScribe: A Sequence Generation Model for  
134 Reaction Diagram Parsing, *J. Chem. Inf. Model.*, 2023, **63**, 4030–4041.
- 135 16 K. Liang, D. Zhang, Y. Su, L. Lu, J. Hu, Y.-H. Chen, X. Zhang, A. Lei and H. Yi, Fragile intermediate  
136 identification and reactivity elucidation in electrochemical oxidative  $\alpha$ -C(sp<sup>3</sup>)-H functionalization  
137 of tertiary amines, *Chem. Sci.*, 2023, **14**, 4152–4157.
